RESEARCH ARTICLE

# Effect of excess iodine intake on thyroid diseases in different populations: A systematic review and meta-analyses including observational studies

Ryoko Katagiri<sup>1</sup>, Xiaoyi Yuan<sup>2</sup>, Satomi Kobayashi<sup>2</sup>, Satoshi Sasaki<sup>1,2\*</sup>

**1** Department of Social and Preventive Epidemiology, Graduate School of Medicine, the University of Tokyo, Bunkyo-ku, Tokyo, Japan, **2** Department of Social and Preventive Epidemiology, School of Public Health, the University of Tokyo, Bunkyo-ku, Tokyo, Japan

\* [stssasak@m.u-tokyo.ac.jp](mailto:stssasak@m.u-tokyo.ac.jp)

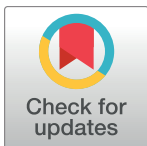

## Abstract

### Background

Although several reports concerning the association of iodine excess and thyroid disease have appeared, no systematic review of the association between iodine excess intake and thyroid diseases, especially hyperthyroidism and hypothyroidism, has yet been reported.

### Method

We conducted a systematic search of Ovid MEDLINE, PubMed, Cochrane Central Register of Controlled Trials databases, Ichushi-Web and CiNii database for intervention trials and observational studies. Search terms were constructed from related words for excess AND iodine intake or excretion AND thyroid hormones or diseases AND study designs. After considering the qualitative heterogeneity among studies, a meta-analysis was conducted and odds ratios and 95% confidence intervals (CI) were estimated in random-effects models. A protocol was registered with PROSPERO (No. CRD42015028081).

### Results

50 articles were included, including three intervention trials, six case-control studies, six follow-up studies and 35 cross-sectional studies. Three cross-sectional studies in adults included in meta-analysis. Odds ratio of overt and subclinical hypothyroidism between excess and adequate populations were 2.78 (CI:1.47 to 5.27) and 2.03 (CI:1.58 to 2.62) in adults, respectively. Source of excess iodine status was mainly iodized salt or water in included studies.

### Conclusion

Although universal salt iodization has improved goiter rates, chronic exposure to excess iodine from water or poorly monitored salt are risk factors for hypothyroidism in free-living populations. Monitoring of both iodine concentration in salt as well as the iodine concentration in local drinking water are essential to preventing thyroid diseases. Hypothyroidism

## OPEN ACCESS

**Citation:** Katagiri R, Yuan X, Kobayashi S, Sasaki S (2017) Effect of excess iodine intake on thyroid diseases in different populations: A systematic review and meta-analyses including observational studies. PLoS ONE 12(3): e0173722. doi:10.1371/journal.pone.0173722

**Editor:** Frank Wieringa, Institut de recherche pour le developpement, FRANCE

**Received:** September 16, 2016

**Accepted:** February 24, 2017

**Published:** March 10, 2017

**Copyright:** © 2017 Katagiri et al. This is an open access article distributed under the terms of the [Creative Commons Attribution License](https://creativecommons.org/licenses/by/4.0/), which permits unrestricted use, distribution, and reproduction in any medium, provided the original author and source are credited.

**Data Availability Statement:** All data used in this study are from previous published studies and can be found in databases such as PubMed, Medline, etc.

**Funding:** The authors received no specific funding for this work.

**Competing interests:** The authors have declared that no competing interests exist.

should be also carefully monitored in areas with excess iodine. Because of the low quality and limited number of included studies, further evidence and review are required.

## Introduction

Iodine deficiency disorders are a major global public health problem. The World Health Organization (WHO) strongly recommends that “All food-grade salt, used in household and food processing, should be fortified with iodine as a safe and effective strategy for the prevention and control of iodine deficiency disorders in populations living in stable and emergency settings” [1]. Following the recommendation of the WHO and United Nations Children’s Fund (UNICEF) in 1993, universal salt iodization (USI) has been implemented in over 120 countries [2]. At the same time, monitoring iodine concentration in salt is recommended to prevent excess iodine intake [1]. Regarding iodine intake, the Tolerable Upper Intake Level (UL) for adults in the US is 1100 µg/day for adults [3]. However, instead of assessing iodine intake itself, measurement of urinary iodine concentration (UIC) or urinary iodine excretion per day (UIE) in a population is recommended as a reflection of recent iodine intake because “urinary iodine is well-accepted, cost-efficient and easily obtainable indicator for iodine status” [1]. Since it is easier to assess UIC than UIE, the WHO’s epidemiologic criteria define a median UIC  $\geq 300$  µg/L as “Excessive” in a population of school-age children (6 years or older). This cut-off value can be applied to adults, with the exception of pregnant or lactating women [4].

Excess iodine intake is considered to be associated with hyperthyroidism or hypothyroidism in some vulnerable individuals [5, 6]. Iodine-induced hyperthyroidism (IIH) has been reported as a side effect of iodine supplementation. This is also called as “Jod-Basedow phenomenon”. IIH is likely to occur in individuals with thyroid nodular changes or in populations in whom iodine intake follows recent iodine fortification [7, 8]. Delange *et al.* described IIH in two African countries which had previously experienced severe iodine deficiency and had recently introduced iodized salt but with poor monitoring (median urinary iodine of 300–450 µg/L) [7–9]. In contrast, only a few papers have described IIH in iodine-sufficient countries around the world [10]. Among iodine-sufficient areas, IIH was initially reported in individuals living in Boston after administration of a high dose of iodine (180 mg per day) [11]. In Japan, a country with high iodine intake, two cases of IIH in women who consumed 28 mg–140 mg of iodine per day as soup stock from kelp was reported [12].

The other side effect of iodine excess is hypothyroidism. A reduction in thyroid hormones under a high iodide concentration is called the “Wolff-Chaikoff effect” [13]. Normally, thyroid hormone levels return to normal after a few days of this effect, termed the so-called “escape” or “adaptation” phenomenon [14]. Although the mechanism of iodine-induced hypothyroidism remains unclear, failure of this adaptation is considered to play a role. As is the case of IIH, individuals with predisposing thyroid damage such as autoimmune thyroiditis or thyroidectomy are susceptible to iodine-induced hypothyroidism [6].

Although several non-systematic reviews have examined the association between iodine excess and thyroid diseases [5, 6, 15], no systematic review has appeared to date. Here, therefore, we conducted a systematic review to summarize previous studies, mainly observational studies, because a randomized trial to examine the association between excess iodine and occurrence of thyroid diseases is considered to be difficult. Moreover, effect of chronic excess iodine exposure could be observed mainly in observational studies. On the contrary, acute excess or toxic amount of intake were not included in this review because the focus of this

study was to identify the effect on thyroid under chronic iodine excess. The specific aims of the paper was (1) to confirm whether excess iodine is associated with thyroid diseases such as hyper- and hypo-thyroidism focusing on free-living populations; (2) to identify what kind of thyroid disease is likely to occur under chronic excess iodine status and (3) to find common features in thyroid hormone status in people with excess iodine intake.

## Methods

### Search strategy

Ovid MEDLINE, PubMed, Cochrane Central Register of Controlled Trials databases were searched for intervention trials and observational studies on the effect of excess iodine intake on thyroid diseases. Additionally, Ichushi-Web and CiNii database were used to search for relevant Japanese papers. *Ichushi-Web* and *CiNii* database were used for Japanese papers. The first search was conducted on 24 Nov 2015 and the latest search on 3 June 2016. A protocol of this review was registered with PROSPERO (No. CRD42015028081). Search terms were formulated as follows: related words for excess AND iodine intake or excretion AND thyroid hormones or diseases AND study designs (S1 Table). Although long term exposure of excess iodine were focused on in this review, search words were not limited because there was a possibility that words for exposure term did not appear in titles or abstracts. Language of publications was limited to English or Japanese. Only human studies were included, and year of publication was not limited. Two authors (RK and XY) independently screened the title and abstract for eligibility and then assessed the full text as below. Disagreements were resolved by discussion to reach consensus. This review was conducted according to Preferred Reporting Items for Systematic Reviews and Meta-Analyses (PRISMA) checklist. (S2 Table)

### Study selection

Eligibility criteria were original articles which examined the relationship between iodine exposure in excess and the incidence or prevalence of thyroid diseases, or between iodine excess and changes in thyroid hormones in free-living populations. Eligible populations were free-living adults (including apparently healthy elderly in nursing homes), adolescents, children and infants. A paper concerning newborns was excluded because the iodine status of newborns was considered to be influenced by their mother's situation, and not reflective of the iodine intake of the newborns themselves. Eligible iodine exposure was excess urinary iodine excretion or excess iodine intake. Medications, radiation or other unnatural sources of iodine except oral supplementation were excluded in this systematic review.

Specific cut-off values for excess urinary iodine excretion were 300  $\mu\text{g/L}$  in urinary iodine concentration in populations of school-age children and adults and 500  $\mu\text{g/L}$  for pregnant women, in accordance with the WHO epidemiologic criteria for assessing iodine nutrition [4]. Since the WHO criteria do not define a cut-off value as "excess" for lactating women, the value of 500  $\mu\text{g/L}$  was also used for lactating women. Similarly, 300  $\mu\text{g/L}$  was used for children aged 2 to 5 years. If urinary iodine concentration was described in micrograms per gram creatinine ( $\mu\text{g/g}\cdot\text{Cre}$ ), based on urine and creatinine excretion of 1.5 L and 1 g per day, respectively, the cut-off for adults was defined as 450  $\mu\text{g/g}\cdot\text{Cre}$  ( $300 \mu\text{g/L} \cdot 1.5\text{L}$ ). For children, based on urine and creatinine excretion of 500–1500 ml and around 20 mg/kg per day [16], and assuming that the value in  $\mu\text{g/g}\cdot\text{Cre}$  is close to that in  $\mu\text{g/L}$ , the cut-off value for school-age children was defined as 300  $\mu\text{g/g}\cdot\text{Cre}$ . For pregnant women, lactating women and children under 6 years old, we decided to discuss inclusion criteria when any articles found during the search which used  $\mu\text{g/g}\cdot\text{Cre}$ . Accordingly, eligibility criteria for excess iodine excretion were as follows: 1) papers which included populations with a median or mean urinary iodine concentration

above the cut-off values; and 2) papers which included one population group (category) with a urinary iodine concentration above the cut-off values.

Intake in studies using dietary records, 24-hour recall or food frequency questionnaires were recognized as excess when the amount was over 1100 µg/d for adults, using the UL value in the US dietary reference intake [3]. Iodine supplementation was judged using the same value. Although the Institute of Medicine has set ULs of 300 µg/d for 4-8-year-olds, 600 µg/d for 9-13-year-olds and 900 µg/d for 14-18-year-olds, we decided to use 600 µg/d for populations under 18 years because papers sometimes included populations across several age ranges. For intervention trials, oral iodine tablet supplementation was included, while iodized salt or iodine-containing oil (eg. Lipiodol) were excluded. This is because total iodized salt intake was difficult to measure accurately by household survey, and oil was not typically used for continuous intake. Eligible outcomes were thyroid diseases (hyper- and hypo-thyroidism, goiter and nodule), thyroid volume and thyroid hormones (thyroid-stimulating hormone (TSH), triiodothyronine (T3), thyroxine (T4) and thyroglobulin (Tg)). Because we decided not to assess the association between antibody or autoimmune thyroiditis and excess iodine intake in this review, anti-thyroid antibody was included in search terms only, and was not included in eligible studies. We included studies with intervention (randomized and non-randomized trials), cohort, case-control, and cross-sectional designs.

### Quality assessment and data extraction

Data extraction and quality assessment of selected papers were conducted by one author (RK). The following information was extracted and tabulated: basic information, study design, setting, exclusion criteria, sample size, characteristics of participants, study period, assessment method of exposure and outcome, adjusted confounders and main findings, such as crude values, percentages and measures of association. If several adjusted models were described, measures of association were extracted from the fully adjusted model. Although diagnostic criteria of thyroid diseases differed slightly among studies, especially the cut-off value of thyroid hormones, data were obtained in accordance with the paper described. Contact with authors was not undertaken.

Regarding the study quality of randomized trials, risk of bias was assessed according to the domains in the Cochrane Handbook for Systematic Reviews of Interventions as follows: 1) random sequence generation, 2) allocation concealment, 3) blinding of participants and personnel, 4) blinding of outcome assessment, 5) incomplete outcome data, and 6) selective reporting [17]. Observational studies were assessed with the Risk of Bias Assessment tool for Non-randomized Studies (RoBANS), which includes the following six domains: 1) selection of participants, 2) confounding variables, 3) measurement of exposure, 4) blinding of outcome assessments, 5) incomplete outcome data, and 6) selective outcome domains [18] (S3 Table). The results from these assessments were used qualitatively.

### Data analyses

Meta-analysis was conducted after consideration of the number of included comparison studies and qualitative heterogeneity among studies for each outcome. Odds ratios and 95% confidence intervals (CIs) were calculated and meta-analysis was carried out using a random-effects model in Mantel-Haenszel analysis. The heterogeneity of studies was assessed qualitatively and quantitatively. Qualitative heterogeneity was considered in terms of population characteristics, year, country, setting, assessment method, implication and coverage of USI, and analysis method of outcome. Statistical heterogeneity was assessed with  $I^2$  and p-value in the chi-square test. An  $I^2$  more than 50% indicted the presence of heterogeneity [19].

## Results

After the screening of titles and abstracts, we identified 70 relevant articles (Fig 1). The full text of these articles was assessed and 41 were identified for inclusion. We hand-searched the titles of the references in these 41 included articles and examined the abstracts of potential papers. This step revealed a further nine eligible articles, giving a total of 50 papers for inclusion. Only one of these was identified from the Japanese databases. These 50 articles included three intervention trials (two randomized controlled trials and one non-randomized controlled trial), six case-control studies, and six follow-up (cohort) studies, including four studies from one survey. The remaining 35 papers were cross-sectional studies. Eight papers were conducted in adults, excluding pregnant women, 23 in children aged 6 months to 19 years (including one study which examined both adults and children), and five in pregnant women. Meta-analysis could not be carried out on the intervention, case-control or follow-up studies because the number of studies for each outcome was considered too small to integrate in meta-analysis. For the cross-sectional studies, meta-analysis was conducted only for overt hypothyroidism (OH) in adults and subclinical hypothyroidism (SCH) in adults, children and pregnant women. For hyperthyroidism and OH in children and pregnant women, the number of cases in each study was small, with most fewer than ten cases. We also excluded goiter and other outcomes from meta-analysis because we judged that these studies had substantial qualitative heterogeneity with regard to iodine source, coverage of USI and outcome assessment method. Sensitivity analysis was not conducted because of the small number of included papers.

### Results from intervention trials

The three selected intervention trials and their results are shown in Table 1 [20–22]. All three were in adults and intervention period was more than 4 weeks in all papers. Sang *et al.* conducted a double-blinded randomized controlled trial to explore the safe upper level of iodine intake for Chinese [20]. The quality of this study was judged to be medium. However, the other two papers [21,22] had problems in outcome reporting or study design. Although they differed with regard to baseline UIC, participant age and amount of administration, median or mean UIC and thyroid stimulating hormone (TSH) rose steeply at the time of supplement termination. During the follow-up period (2–4 weeks after the termination of supplementation), UIC returned to almost baseline level but TSH remained high in some participants. In China, iodine intake over 800 µg/d caused prolonged SCH in populations with “above requirement” baseline iodine status [20]. Hyperthyroidism was also observed on administration of 50 mg iodine in an elderly population with mild iodine deficiency at baseline [21].

### Results from case-control studies

The six case-control studies are shown in Table 2 [23–28]. Cases were hypothyroidism in three [23, 26, 28], nodule in one [24], pregnancy in one [25] and several thyroid diseases including hyperthyroidism, hypothyroidism, thyroiditis and nodule in one [27]. All papers were in adults. Regarding subclinical and overt hypothyroidism, median or mean UIC in the case group was 300 µg/L and higher than that in the control group in three of the four studies. Only one study, from Japan, reported lower urinary iodine excretion in the hypothyroidism group [28]. With regard to quality assessment, although five of the six studies matched for mean age range (except Wang *et al.* [24]), none of the six adjusted their analysis for targeted diseases.

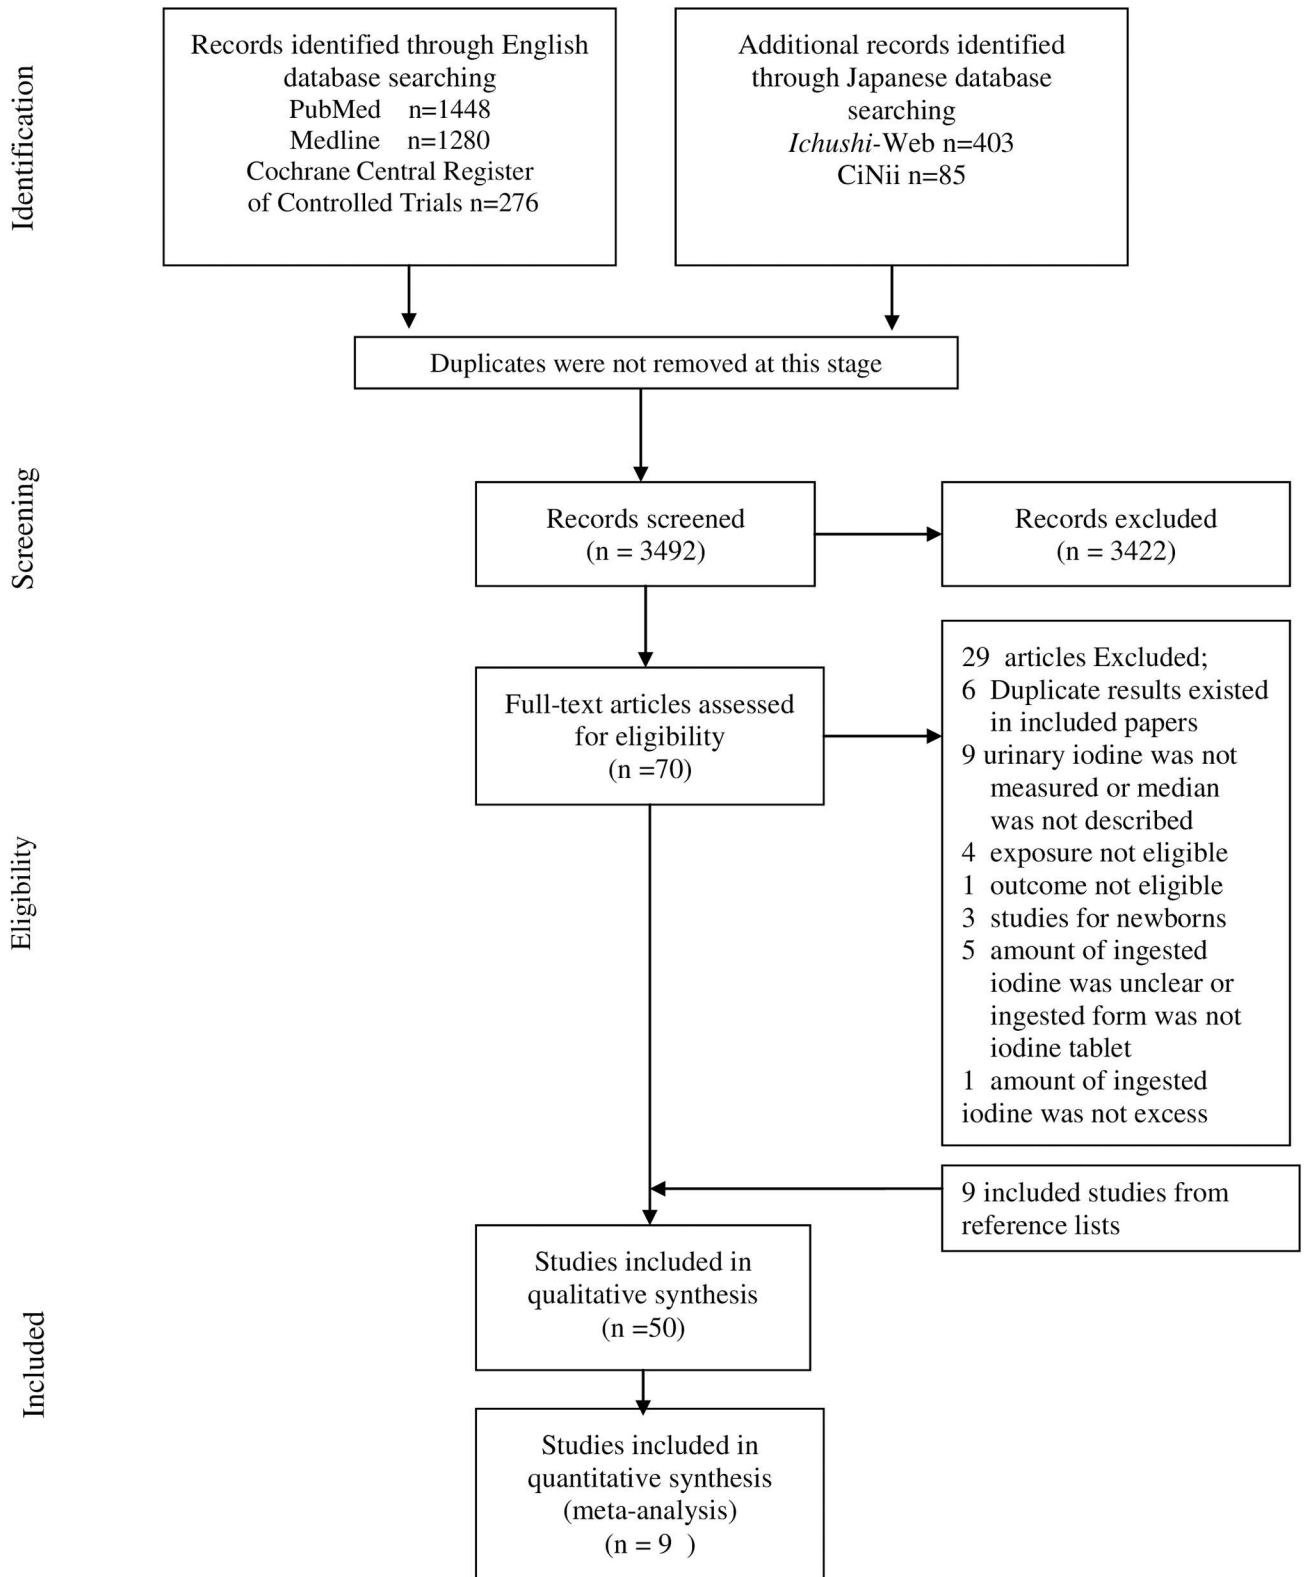

**Fig 1. Flow chart of the selection process (searched on 3 June 2016).**

doi:10.1371/journal.pone.0173722.g001

**Table 1. Intervention studies, including randomized controlled trials, of the impact of an excess or safety upper limit of iodine supplementation in thyroid function.**

| Author, Year, Country, Age                | Intervention                                                                                                                                                                                 | Baseline                                                                                                                                                                                         |                                                                                                                                              |                                                                                                                                                                                        | Post-intervention                                                                                                                      |                                                                                                                                       |                                                                                                                                       | Follow-up                                                                             |                                                                                       |                                                                                                                                                                                    | Clinical outcome                                                                                                                                                                            |
|-------------------------------------------|----------------------------------------------------------------------------------------------------------------------------------------------------------------------------------------------|--------------------------------------------------------------------------------------------------------------------------------------------------------------------------------------------------|----------------------------------------------------------------------------------------------------------------------------------------------|----------------------------------------------------------------------------------------------------------------------------------------------------------------------------------------|----------------------------------------------------------------------------------------------------------------------------------------|---------------------------------------------------------------------------------------------------------------------------------------|---------------------------------------------------------------------------------------------------------------------------------------|---------------------------------------------------------------------------------------|---------------------------------------------------------------------------------------|------------------------------------------------------------------------------------------------------------------------------------------------------------------------------------|---------------------------------------------------------------------------------------------------------------------------------------------------------------------------------------------|
|                                           |                                                                                                                                                                                              | MUIC                                                                                                                                                                                             | TSH                                                                                                                                          | FT4                                                                                                                                                                                    | MUIC                                                                                                                                   | TSH                                                                                                                                   | FT3                                                                                                                                   | MUIC                                                                                  | TSH                                                                                   | FT4                                                                                                                                                                                |                                                                                                                                                                                             |
| Sang, 2012, China, 19-25y [20]            | 0-2000 µg/d iodine for 4 wk                                                                                                                                                                  | <ul style="list-style-type: none"> <li>MUIC: 237-381 µg/L</li> <li>TSH: 2-2.7 mIU/L</li> <li>FT4: 16.2-19.1 pmol/L</li> <li>FT3: 4.7-5.3 pmol/L</li> <li>Thyroid volume: 11.0-14.8 ml</li> </ul> | <ul style="list-style-type: none"> <li>Increased by 20-60% in 0-400 µg/d</li> <li>51-109% in 500-2000 µg/d</li> <li>All p&lt;0.05</li> </ul> | <ul style="list-style-type: none"> <li>Increased by 1-5% in 0-400 µg/d</li> <li>Decreased by 3-8% in 500-1250 µg/d</li> <li>Decreased by 12-17% in 1500-2000 µg/d p&lt;0.05</li> </ul> | <ul style="list-style-type: none"> <li>Changed by 2-4% in 0-400 µg/d</li> <li>Decreased by 6-12% in 500-2000 µg/d p&lt;0.05</li> </ul> |                                                                                                                                       |                                                                                                                                       |                                                                                       |                                                                                       |                                                                                                                                                                                    | <ul style="list-style-type: none"> <li>At 4wk, from 300 µg/d, subclinical hypothyroidism appeared (5%), 18-47% in 750-2000 µg/d</li> <li>After 1-3 month, 5-12% in 400-2000 µg/d</li> </ul> |
| Thomson, 2011, New Zealand, mean 73y [21] | <ul style="list-style-type: none"> <li>&gt;50 mg iodine as iodate/day for 8 weeks (high I; n = 21)</li> <li>80 µg iodine as iodate/day (low I; n = 25);</li> <li>placebo (n = 24)</li> </ul> | <ul style="list-style-type: none"> <li>MUIC: 54.5 µg/L</li> <li>TSH: 2.6 mIU/L</li> <li>FT4: 14.1 pmol/L</li> <li>FT3: 4.86 pmol/L</li> </ul>                                                    | <ul style="list-style-type: none"> <li>1.6-10-fold increase (high I; n = 4)</li> <li>Decreased to 1/38-1/7 (high I; n = 3)</li> </ul>        | <ul style="list-style-type: none"> <li>Decreased by 11-50% (high I; n = 4)</li> <li>Increasing by 71% (high I; n = 1)</li> </ul>                                                       | <ul style="list-style-type: none"> <li>Increased by 52-54% (high I; n=2)</li> </ul>                                                    | <ul style="list-style-type: none"> <li>Stop after 4w</li> <li>0.7-1.1-fold change in high I</li> <li>1.1-1.5-fold in low I</li> </ul> | <ul style="list-style-type: none"> <li>Increased by 27-92% (high I; n = 2)</li> <li>Decreased to 1/7-1/114 (high I; n = 2)</li> </ul> | <ul style="list-style-type: none"> <li>Increased by 60-91% (high I; n = 2)</li> </ul> | <ul style="list-style-type: none"> <li>Increased by 28-65% (high I; n = 2)</li> </ul> | <ul style="list-style-type: none"> <li>Transient subclinical hypothyroidism (n = 2)</li> <li>Transient clinical hypothyroidism (n = 2)</li> <li>Hyperthyroidism (n = 2)</li> </ul> |                                                                                                                                                                                             |
| Namba, 1992, Japan, 25-39y [22]           | After 1 wk restriction of iodine intake, 27 mg iodine/day for 4 wk                                                                                                                           | <ul style="list-style-type: none"> <li>Mean MUIC: 43 nmol/µmol creatinine</li> <li>TSH: 0.95 mU/L</li> <li>FT4: 19.4 pmol/L</li> <li>FT3: 1.84 nmol/L</li> </ul>                                 | <ul style="list-style-type: none"> <li>2.5-fold increase</li> </ul>                                                                          | <ul style="list-style-type: none"> <li>Decreased by 15%</li> </ul>                                                                                                                     | <ul style="list-style-type: none"> <li>Not assessed</li> </ul>                                                                         | <ul style="list-style-type: none"> <li>Stop after 4 w</li> <li>Returned to baseline level</li> </ul>                                  | <ul style="list-style-type: none"> <li>Increased by 42%</li> </ul>                                                                    | <ul style="list-style-type: none"> <li>Decreased by 5%</li> </ul>                     |                                                                                       |                                                                                                                                                                                    |                                                                                                                                                                                             |

Abbreviations: MUIC, median (or mean) urinary iodine concentration; TSH, thyroid-stimulating hormone; FT3, free triiodothyronine; FT4, free thyroxine

doi:10.1371/journal.pone.0173722.t001

**Table 2. Case-control studies, including populations with excess mean or median urinary iodine concentration (adults).**

| Author, Year, Country, Age          | Case                                                                                | Median or mean UIC (µg/l) Case, Control                                                                                                                                                                                                                                                                                                                                                                                                                    | TSH                                        | FT4 (pmol/L)                 | FT3 (pmol/L)                     | Hyperthyroidism   | Subclinical hyperthyroidism | Hypothyroidism      | Subclinical hypothyroidism |
|-------------------------------------|-------------------------------------------------------------------------------------|------------------------------------------------------------------------------------------------------------------------------------------------------------------------------------------------------------------------------------------------------------------------------------------------------------------------------------------------------------------------------------------------------------------------------------------------------------|--------------------------------------------|------------------------------|----------------------------------|-------------------|-----------------------------|---------------------|----------------------------|
| Kotwal, 2015, India, mean 32y [23]  | overt hypothyroidism (n = 150), hospital (n = 154) and community (n = 488) controls | Lower in control: 310 vs 301 (p = 0.02) vs 215 (p = 0.001)                                                                                                                                                                                                                                                                                                                                                                                                 | 13.2 vs 2.3 vs 2.3 mU/L p<0.05             |                              |                                  |                   |                             |                     |                            |
| Wang, 2014, China, mean 49y [24]    | benign thyroid nodule (n = 51); control (n = 306)                                   | Higher in case: 331.33 vs 174.3 P<0.001                                                                                                                                                                                                                                                                                                                                                                                                                    | 2.32 vs 2.28 µU/ml                         | 17.4 vs 17.1                 | 4.19 vs 4.2                      |                   |                             |                     |                            |
| Du, 2013, China, mean 27y, 29y [25] | 27wk after pregnancy (n = 300); control (n = 300)                                   | 1227.9 vs 951.2                                                                                                                                                                                                                                                                                                                                                                                                                                            | 2.9 vs 3.1 mU/l                            | 13.5 vs 14.3 p<0.01          | 4.0 vs 4.7 p<0.01                | 0.3% vs 3% p<0.05 | 19.7% vs 27.3% p = 0.027    | 0.7% vs 0.3% p<0.05 | 2% vs 0.3% p<0.05          |
| Alsayed, 2008, Egypt, mean 29y [26] | autoimmune subclinical hypothyroidism (n = 73); control (n = 60)                    | Higher in case: 326.97, 274.45 P<0.01                                                                                                                                                                                                                                                                                                                                                                                                                      | Higher in case: 8.29 vs 2.07 µU/ml p<0.001 | 9.29 vs 2.07 pmol/L          |                                  |                   |                             |                     |                            |
| Kim, 2000, Korea, mean 42y [27]     | thyroid disease (n = 184); control (n = 207)                                        | <ul style="list-style-type: none"> <li>• single goiter (n = 17) mean 2880 NS</li> <li>• hyperthyroidism (n = 42) 4900 p&lt;0.05</li> <li>• hypothyroidism (n = 15) 4570 p&lt;0.05</li> <li>• subacute thyroiditis (n = 15) 4690 p&lt;0.05</li> <li>• painless thyroiditis (n = 12) 3460 NS</li> <li>• Hashimoto's thyroiditis (n = 36) 4140 p&lt;0.05</li> <li>• benign thyroid nodule (n = 36) 2950 NS</li> <li>• control (n = 207) 2110µg/day</li> </ul> |                                            |                              |                                  |                   |                             |                     |                            |
| Ishizuki, 1992, Japan, 32-74y [28]  | hypothyroidism (n = 8), chronic thyroiditis (n = 32), control (n = 32)              | Lower in hypothyroidism group: 268.3 vs 471.8 vs 465.6 µg/day                                                                                                                                                                                                                                                                                                                                                                                              | 75.3 vs 0.8 vs 1.2 µU/ml                   | T4 (µg/dl) 4.1 vs 9.1 vs 8.3 | T3 (ng/dl) 112.8 vs 135 vs 132.4 |                   |                             |                     |                            |

Abbreviations: MUIC, median or mean urinary iodine concentration; TSH, thyroid-stimulating hormone; FT4, free thyroxine; FT3, free triiodothyronine; NS, not significant

doi:10.1371/journal.pone.0173722.t002

## Results from follow-up studies

Six papers from three surveys were included, including two from China and one from a refugee camp in Algeria (Table 3) [29–34]. Teng *et al.* [29] and three other papers [30–32] reported from three areas in China as follows: inhabitants consumed locally produced salt with low levels of iodine, even after salt iodization was begun in 1996 in the first area; iodized salt was used and iodine status of the population was improved from mildly deficient in the second area; and an excess iodine level owing to drinking water was reported in the third area. Wang *et al.*



**Table 3. Follow-up studies including populations with excess mean or median urinary iodine concentration.**

| Author<br>Year,<br>Country,<br>Age                                         | Baseline                                                 |                          |                                                                           |                         |                                                                           |                                    | Follow-up                           |                                                                                                                                             |                                             |                                |                         |                                                                       |                                                                                                                      |                                  |
|----------------------------------------------------------------------------|----------------------------------------------------------|--------------------------|---------------------------------------------------------------------------|-------------------------|---------------------------------------------------------------------------|------------------------------------|-------------------------------------|---------------------------------------------------------------------------------------------------------------------------------------------|---------------------------------------------|--------------------------------|-------------------------|-----------------------------------------------------------------------|----------------------------------------------------------------------------------------------------------------------|----------------------------------|
|                                                                            | MUIC                                                     | Overt<br>Hyperthyroidism | Subclinical<br>hyperthyroidism                                            | Overt<br>hypothyroidism | Subclinical<br>hypothyroidism                                             | Goiter                             | Nodule                              | MUIC                                                                                                                                        | Overt<br>Hyperthyroidism                    | Subclinical<br>hyperthyroidism | Overt<br>Hypothyroidism | Subclinical<br>hypothyroidism                                         | Goiter                                                                                                               | Nodule                           |
| Teng,<br>2006,<br>China,<br>>13y [29] <sup>a</sup>                         | 615 (A) vs<br>375 (B) vs<br>103 (C)                      | 1.2% vs 2.0% vs<br>1.6%  | • 1.1% vs 3.9% vs<br>3.7%<br>• Adjusted OR<br>0.22 (A vs C (ref))<br>[31] | 2% vs 0.9% vs<br>0.3%   | • 6.1% vs 2.9%<br>vs 0.9%<br>• Adjusted OR<br>6.39 (A vs C<br>(ref)) [31] | 7.6%<br>vs<br>16.9%<br>vs<br>23.2% | 10.8%<br>vs<br>10.2%<br>vs<br>12.6% | • 5 year<br>• 635 vs<br>350 vs<br>97                                                                                                        | • 5y incidence<br>• 0.8% vs 0.9% vs<br>1.4% | 1% vs 2% vs<br>1.4%            | 0.3% vs 0.5% vs<br>0.2% | • 2.9% vs 2.6%<br>vs 0.2%<br>• OR 9.1 (A vs B)<br>C normal to<br>SCH) | • 7.7%<br>vs 6.8%<br>vs<br>12.1%<br>• OR<br>1.46 (A<br>vs B<br>(ref))<br>[30]                                        | 6.6%<br>vs<br>6.9%<br>vs<br>4.4% |
| Wang,<br>2015,<br>China, 8-<br>10y [33]                                    | 83 µg/L in<br>1995,<br>377 µg/L<br>in 1997<br>(n = 4767) |                          |                                                                           |                         |                                                                           | 55.2%<br>in<br>1997                |                                     | 407 µg/L<br>in 1995,<br>334 µg/L<br>in 2001;<br>270 µg/L<br>in 2002,<br>243 µg/L<br>in 2005;<br>325 µg/L<br>in 2009,<br>345 µg/L<br>in 2011 |                                             |                                |                         |                                                                       | 23.3%<br>in 1999;<br>2.9% in<br>2001;<br>3.9% in<br>2002;<br>3.8% in<br>2005;<br>1.0% in<br>2009;<br>1.7% in<br>2011 |                                  |
| Aakre,<br>2015,<br>refugee<br>camps [34]<br>Baseline<br>lactating<br>women | 350 µg/L<br>(n = 111)                                    | 5.4%                     | 2.7%                                                                      | 4.5%                    | 14.4%                                                                     |                                    |                                     | • 3 year<br>• 617 µg/<br>L<br>(n = 78)                                                                                                      | 3.0%                                        | 4.5%                           | 1.5%                    | 22.4%                                                                 |                                                                                                                      |                                  |

<sup>a</sup> Papers in reference nos. [30] [31] and [32] were from the same reference dataset [29]. In the article [32], thyroglobulin (Tg) was compared and shown to significantly differ among three areas. At baseline, median serum Tg (ng/mL) was 6.6 vs 5.6 vs 7.8 in area (A) vs (B) vs (C) in the table and 9.7 vs 8.6 vs 11.2 at follow-up.

Abbreviations: MUIC, median or mean urinary iodine concentration; OR, odds ratio; ref, reference

doi:10.1371/journal.pone.0173722.t003

also reported the time course of changes in UIC and goiter rate before and after the implementation of universal salt iodization in China [33]. Teng *et al.* reported that the prevalence of OH and SCH was the highest in the excess area, and that excessive intake was a risk factor for SCH at follow-up among subjects who were normal at baseline, while a shift in iodine intake from mildly deficient to more than adequate was a risk factor for continued SCH [29]. Aakre *et al.* also reported changes in thyroid dysfunction in lactating women [34]. Although lactating status at baseline in this population might have changed by the time of follow-up, three-quarters of subjects with hypothyroidism retained their hypothyroidism at three-year follow-up while nearly 8% of subjects developed new subclinical hypothyroidism. In their logistic regression model, Teng *et al.* found that both excess iodine intake and mildly deficient iodine intake were risk factors for goiter in normal subjects. [29]. Wang *et al.* reported that total goiter rate was correlated with average thyroid volume after the elimination of iodine deficiency diseases, and that an increase in UIC from less than 300 µg/L to over 300 µg/L decreased the average thyroid volume whereas a steady state of over 300 µg/L was associated with a slight increase in the average thyroid volume [33].

## Results from cross-sectional studies

Eight studies in adults were included [35–42]. Since only one of these reported biomarker values [36], Table 4 tabulates results for thyroid diseases only. The paper by Szabolcs *et al.* was in elderly subjects living in a nursing home [37]. Excess iodine intake was caused by high iodine content in drinking water in five papers [35–37, 41, 42], USI in one paper [37] and seaweed consumption in one paper [38]. The cause was not assessed in one paper because of an adequate median UIC [40]. Four studies compared high and low iodine status populations [35, 36, 37, 41], three papers described one population with a median or mean UIC of the total population of over 300 µg/L [38, 39, 42], and one paper reported that median UIC was adequate but assessed categories of UIC over 300 µg/L [41]. Regarding study quality, three papers used a regression model [35, 40, 42], of which two used models for some of the outcomes [35, 42].

Twenty-three papers reported cross-sectional studies in children [41, 43–64], of which 14 papers mainly reported thyroid diseases [41, 46, 47–49, 51–55, 56–58, 60], four reported biomarkers [61–64] and five described both [43–45, 50, 59] (Tables 5 and 6). Except for Nepal *et al.* in infants [43], most studies were in school-age children. Water was a cause of excess iodine status in ten papers, from China [44–48, 52, 58, 59], refugee camps in Africa [53] and Somalia [41]. USI caused excess intake in five papers, from Sudan [51], Saudi Arabia [49], Uganda [56], refugee camps in Africa [55] and Brazil [54]. Fortified food might have been a cause in two papers, from Sudan [51] and the USA [60], while seafood consumption might have been the cause in one paper from Japan [57]. The cause was not clearly described in others [43, 50] or was not assessed because median UIC was not excessive [61–64].

Five studies in pregnant women were identified (Table 7) [65–69]. Gestational age was first trimester in two studies [66, 69], third trimester in one [68] and all terms in two [65, 67]. Median UIC was less than 300 µg/L in two papers [66, 67], above 300 µg/L in two papers [65, 69], while excess and adequate iodine areas were compared in one paper [68]. Two papers included multivariate analysis [66, 67].

## Hypothyroidism in cross-sectional studies in adults, children and pregnant women

Regarding OH and SCH, four studies in adults (Table 4) [35–38], three in children (Table 5) [43–45], and three in pregnant women (Table 7) [66–68] described the percentage or odds ratio of hypothyroidism.

**Table 4. Cross-sectional studies including excess median urinary iodine in adults.**

| Author, Year, Country, Age                   | MUIC                                                                                                        | Overt Hypothyroidism                  | Subclinical hypothyroidism                                                                    | Hyperthyroidism (overt+subclinical)                                          | Subclinical hyperthyroidism | Goiter                                                                        | Nodule                                                                                | Thyroid volume (ml)                        | Others                                             |
|----------------------------------------------|-------------------------------------------------------------------------------------------------------------|---------------------------------------|-----------------------------------------------------------------------------------------------|------------------------------------------------------------------------------|-----------------------------|-------------------------------------------------------------------------------|---------------------------------------------------------------------------------------|--------------------------------------------|----------------------------------------------------|
| Du, 2014, China, >18y [35]                   | 750.18 µg/L (excess group n = 930); 228.70 µg/L (sufficient group n = 550)                                  | 2.6% vs 1.2%                          | • Higher in excess: OR 11.7 (excess) vs 5.79 (sufficient) (vs ref p<0.01)<br>• 20.1% vs 10.4% | • OR 0.404 (excess) vs 0.401 (sufficient) (excess p<0.005)<br>• 1.2% vs 1.0% |                             | • OR 0.981 (excess) vs 0.979 (sufficient) (vs deficient NS)<br>• 2.5% vs 2.3% | • Higher in excess: OR 1.865 (excess) vs 1 (sufficient ref) p<0.01<br>• 15.5% vs 8.7% |                                            |                                                    |
| Tan, 2014, China, 20-50y [36] <sup>a</sup>   | 1152 µg/L (excess area n = 506); 185 µg/L (adequate area n = 348)                                           | 3.6% vs 1.3% NS                       | Higher in excess: 13.6% vs 9.0% p = 0.046                                                     | 3.4% vs 1.3% NS                                                              | 2.2% vs 0% NS               |                                                                               |                                                                                       |                                            |                                                    |
| Szabolcs, 1997, Hungary, 61-97y [37]         | 513 µg/g cre (n = 92 abundant); 100 µg/g cre (n = 135 prophylaxis)                                          | 7.6% vs 1.5% (vs deficient p = 0.006) | 23.9% vs 10.4% (vs deficient p<0.001)                                                         | 0% vs 3% NS                                                                  | 0% vs 1.5% NS               | 12.2% vs 16.4% (vs deficient 39.4% p<0.001)                                   | 3.3% vs 16.2% (vs deficient 20.2% p = 0.001)                                          | 15.1 vs 13.6 (vs deficient 21.9 p = 0.003) |                                                    |
| Konno, 1993, Japan, mean 45y [38]            | 27.1 µmol/L (3441 µg/L n = 4110)                                                                            | 0.39%                                 | 1%                                                                                            | 0.61%                                                                        | 0.27%                       |                                                                               |                                                                                       |                                            | Graves' disease 0.39% Hashimoto's thyroiditis 8.1% |
| Gomo, 1999, Zimbabwe, >35y [39]              | 560 µg/L (n = 516)                                                                                          |                                       |                                                                                               | 3%                                                                           |                             |                                                                               |                                                                                       |                                            |                                                    |
| Chen, 2013, China >18y [40]                  | All 172 µg/L (n = 9412); 100-<200 µg/L n = 3428; 200-<300 µg/L n = 2061 (high); ≥300 mg/L n = 1694 (excess) |                                       |                                                                                               |                                                                              |                             |                                                                               | Adjusted OR:1.01 (high) vs 0.97 (excess) (vs ref normal NS)                           |                                            |                                                    |
| Kassim, 2013, Somalia 15-49y women [41]      | 316 µg/L (n = 219 Zone A); 228 µg/L (n = 196 Zone B)                                                        |                                       |                                                                                               |                                                                              |                             | 1.4% vs 3.3% (visible A vs B)                                                 |                                                                                       |                                            |                                                    |
| Henjum 2011, refugee camp, 15-45y women [42] | 466 µg/L (n = 388)                                                                                          |                                       |                                                                                               |                                                                              |                             | 22%                                                                           | 16% (<1cm) 5% (>1cm)                                                                  | Median 9.4                                 |                                                    |

<sup>a</sup> In the paper by Tan *et al.* [36], serum FT4, FT3 and TSH values were compared between two areas. No significant differences were found in FT4 and FT3, while two values of TSH were significantly different. (Excess area vs adequate area, FT4 (pmol/l):14.7 vs 14.8, FT3 (pmol/l):4.8 vs 4.9, TSH (mIU/l) 2.7 vs 2.4)

Abbreviations: MUIC, median or mean urinary iodine concentration; OR, odds ratio ref; reference NS, not significant

doi:10.1371/journal.pone.0173722.t004

In the adult studies, the sex ratio of participants (male:female) was 1:2 to 1:3. The percentage or odds ratio of SCH was significantly higher in the excess group than in adequate group in most of these adult studies [35–37]. Forest plots for SCH and OH are shown in Fig 2A and 2B. Although one paper was for elderly participants [37], odds ratio in adults for OH and SCH

**Table 5. Cross-sectional studies including excess median urinary iodine in children (outcome: thyroid diseases).**

| Author, Year, Country, age                         | MUIC                                                                                                                                                                                                                                                                                                                                                                    | Overt Hypothyroidism                | Subclinical hypothyroidism                                                                 | Hyperthyroidism (overt+subclinical)         | Goiter                                                                                                                                                                                                                                                                                                   | Nodule                     | Thyroid volume (ml)                       |
|----------------------------------------------------|-------------------------------------------------------------------------------------------------------------------------------------------------------------------------------------------------------------------------------------------------------------------------------------------------------------------------------------------------------------------------|-------------------------------------|--------------------------------------------------------------------------------------------|---------------------------------------------|----------------------------------------------------------------------------------------------------------------------------------------------------------------------------------------------------------------------------------------------------------------------------------------------------------|----------------------------|-------------------------------------------|
| Nepal, 2015, Nepal, 0.5-2y [43]                    | 407 µg/L (n = 630) 100–299 µg/L n = 91 (sufficient); ≥300 µg/L n = 375 (excess)                                                                                                                                                                                                                                                                                         | 1% (sufficient) vs 0.8% (excess) NS | 7.6% (sufficient) vs 7.4% (excess) NS                                                      | 0% (sufficient) vs 1.5% (excess) NS         |                                                                                                                                                                                                                                                                                                          |                            |                                           |
| Sang, 2013, China, 7-13y [44]                      | 1030 µg/L (n = 371 high iodine area HI); 123 µg/L (n = 150 adequate iodine area AI)                                                                                                                                                                                                                                                                                     | 1.1% (HI) vs 0% (AI)                | Higher in HI: 6.7% (HI) vs 0.7% (AI) p = 0.004; Adjusted OR 3.62 (UIC≥600), 5.35 (UIC≥800) | 2.7% (HI) vs 0.7% (AI) NS                   |                                                                                                                                                                                                                                                                                                          |                            |                                           |
| Gao, 2004, China, 6-11y [45]                       | Mean 631µg/L (n = 112) vs 338 µg/L (n = 110) vs 99 µg/L (n = 116)                                                                                                                                                                                                                                                                                                       | 0.9% vs 0% vs 0% NS                 | Higher in excess: 20.5% vs 14.6% vs 4.3% p = 0.001                                         | 0.9% vs 0.9% vs 1.8% over NS subclinical NS |                                                                                                                                                                                                                                                                                                          |                            |                                           |
| Lv, 2014, China, 8-10y [46]                        | 511 µg/L (n = 326 high iodine towns); 401 µg/L (n = 60 control town);                                                                                                                                                                                                                                                                                                   |                                     |                                                                                            |                                             | 24.6% vs 14.0% (age-specific p = 0.015); 33.0% vs 17.5% (body surface area-adjusted p = 0.001)                                                                                                                                                                                                           |                            |                                           |
| Kassim, 2013, Somalia, 6-11y [41]                  | 398 µg/L (n = 268 Zone A); 288 µg/L (n = 239 Zone B)                                                                                                                                                                                                                                                                                                                    |                                     |                                                                                            |                                             | 0.3% vs 1.3% (visible A vs B)                                                                                                                                                                                                                                                                            |                            |                                           |
| Lv, 2012, China, 8-10y [47]                        | 418.8 µg/L (n = 363 one province)                                                                                                                                                                                                                                                                                                                                       |                                     |                                                                                            |                                             | 11.0% (n = 1259)                                                                                                                                                                                                                                                                                         |                            |                                           |
| Li, 2012, China, 8-10y [48]                        | 336.3 µg/L (n = 379 iodine in water 150–300µg/L); 494.8 µg/L (n = 173 iodine in water >300µg/L); Median 421 µg/L (n = 311)                                                                                                                                                                                                                                              |                                     |                                                                                            |                                             | 8.0% (iodine in water >150µg/L n = 550)                                                                                                                                                                                                                                                                  |                            |                                           |
| Alsanosy, 2012, Saudi Arabia, 6-13y [49]           | 464 µg/L (n = 654)                                                                                                                                                                                                                                                                                                                                                      |                                     |                                                                                            |                                             | 11% (palpation)                                                                                                                                                                                                                                                                                          |                            |                                           |
| Medani, 2012, Sudan, 6-12y [50]                    |                                                                                                                                                                                                                                                                                                                                                                         |                                     |                                                                                            |                                             | 34.9% (palpation)                                                                                                                                                                                                                                                                                        |                            |                                           |
| Hussein, 2012, Sudan, 6-12y [51]                   | Median 553 µg/L (n = 140 high iodine city); 160 µg/L (n = 140 control city)                                                                                                                                                                                                                                                                                             |                                     |                                                                                            |                                             | 17.1% vs 1.4% NA (palpation)                                                                                                                                                                                                                                                                             |                            |                                           |
| Shen, 2011, China, 8-10y [52]                      | 460.9 µg/L (n = 24407 iodine in water 150–199 µg/L); 479.5 µg/L (n = 16940 iodine in water 200–249 µg/L); 644.4 µg/L (n = 11486 iodine in water 250–299 µg/L); 765.0 µg/L (n = 1882 iodine in water 300–349 µg/L); 919.4 µg/L (n = 515 iodine in water 350–399 µg/L); 791.3 µg/L (n = 547 iodine in water 400–499 µg/L); 969.8 µg/L (n = 974 iodine in water >500 µg/L) |                                     |                                                                                            |                                             | • 6.2% (water 150–199 µg/L); 5.6% (water 200–249 µg/L); 7.6% (water 250–299 µg/L); 8.8% (water 300–349 µg/L); 11.1% (water 350–399 µg/L); 10.1% (water 400–499 µg/L); 15.8% (water >500 µg/L)<br>• RR: 1.56 (300–399 µg/L), 2.27 (600–699 µg/L), 3.46 (900–999 µg/L), 3.69 (>1500 µg/L) (ref 100–200) NA |                            |                                           |
| Henjum, 2010, refugee camp, 6-14y [53]             | 565 µg/L (n = 421)                                                                                                                                                                                                                                                                                                                                                      |                                     |                                                                                            |                                             | 56.2% (Tvol-for age>P97); 85.6 (Tvol-for-BSA >P97)                                                                                                                                                                                                                                                       |                            | Median 5.0                                |
| Duarte, 2009, Brazil, 7-12y [54]                   | 484.2 µg/L (boys n = 480); 435.3 µg/L (girls n = 484)                                                                                                                                                                                                                                                                                                                   |                                     |                                                                                            |                                             | 1.9% (1.6% boys, 2% girls >P97)                                                                                                                                                                                                                                                                          | 0.2% (0.4% boys, 0% girls) | 5.43 (boys n = 480); 5.62 (girls n = 484) |
| Seal, 2005, 6 refugee camps in Africa, 10-19y [55] | Uganda 726µg/L Ethiopia 1074µg/L Algeria 1170µg/L Zambia 570µg/L                                                                                                                                                                                                                                                                                                        |                                     |                                                                                            |                                             | Uganda 0.4% Ethiopia 1.3% Algeria 7.1% Zambia 0% (visible)                                                                                                                                                                                                                                               |                            |                                           |

(Continued)

Table 5. (Continued)

| Author, Year, Country, age              | MUIC                                                                                   | Overt Hypothyroidism | Subclinical hypothyroidism | Hyperthyroidism (overt+subclinical) | Goiter                                                                  | Nodule                        | Thyroid volume (ml) |
|-----------------------------------------|----------------------------------------------------------------------------------------|----------------------|----------------------------|-------------------------------------|-------------------------------------------------------------------------|-------------------------------|---------------------|
| Bimenya, 2002, Uganda, 6-12y [56]       | 310 µg/L (n = 300)                                                                     |                      |                            |                                     | 60.2% (palpation) down from 74.3 in 1991, visible goiter 30% (n = 2880) |                               |                     |
| Ishigami, 2001, 2 countries, 7-17y [57] | Median 47.3 µg/L (n = 100 Belarus radio-contaminated area), 362.9 µg/L (n = 250 Japan) |                      |                            |                                     | 13.6% (Belarus) vs 1.6% (Japan)                                         | 1.74% (Belarus) vs 0% (Japan) |                     |
| Zhao, 2000, China, 6-15y [58]           | Median 520–1961 µg/L (12 townships, n = 607)                                           |                      |                            |                                     | 12–38% (palpation)                                                      |                               | Abnormal 5–17%      |
| Boyages, 1989, China 7-15y [59]         | 1236.5 µg/g cre (n = 29 excess area); 428.4 µg/g cre (n = 26 sufficient area)          |                      |                            |                                     | 65% (excess) vs 15% (sufficient) (palpation)                            |                               |                     |
| Trowbridge, 1975, USA, 9-16y [60]       | 452 µg/g cre (n = 754)                                                                 |                      |                            |                                     | 6.8% (n = 7785) (palpation)                                             |                               |                     |

Abbreviations: MUIC, median or mean urinary iodine concentration; OR, odds ratio; ref, reference; RR, relative risk; NA, not assessed in the study; NS, not significant

doi:10.1371/journal.pone.0173722.t005

**Table 6. Cross-sectional studies including excess median urinary iodine in children (outcome: biomarkers for thyroid hormone).**

| Author, Year, Country, Age                 | MUIC                                                                                                    | TSH (mIU/L)                                                              | FT4 (pmol/L)                                   | FT3 (pmol/L)                            | Tg (µg/L)                                                                             | Thyroid volume (ml)                                                                             |
|--------------------------------------------|---------------------------------------------------------------------------------------------------------|--------------------------------------------------------------------------|------------------------------------------------|-----------------------------------------|---------------------------------------------------------------------------------------|-------------------------------------------------------------------------------------------------|
| Shakya, 2015, Nepal, 6-11y [61]            | All:292 µg/L (n = 640) 100–199 µg/L n = 126, 200–299 µg/L n = 148, >300µg/l n = 313                     | Median 3.5 (adequate) vs 3.7 (more than adequate) vs 3.2 (excess)        | Median 16.6 vs 15.6 vs 15.9                    | Median 4.0 vs 3.6 vs 4.1                | Median 13.7 vs 15.2 vs 10.9 (p = 0.016 vs 5 UIE categories) Mean 15.3 vs 18.6 vs 17.2 |                                                                                                 |
| Nepal, 2015, Nepal, 0.5-2y [43]            | 407 µg/L (n = 630) 100–299 µg/L n = 91 (sufficient), ≥300 mg/L n = 375 (excess)                         | Geometric mean: 2.9 (sufficient) vs 2.9 (excess)                         | Mean 16.8 (sufficient) vs 17.2 (excess) NS     |                                         | Geometric mean:20.8 (sufficient) vs 21.9 (excess) NS                                  |                                                                                                 |
| Zou, 2014, China, 8-10y [62]               | All: 173.3µg/L; 100–300 µg/L n = 56, >300 µg/l n = 38                                                   | Median 2.9 (excess) vs 2.8 (sufficient)                                  | Median 18.7 (excess) vs 18.3 (sufficient)      | Median 6.1 (excess) vs 6.0 (sufficient) |                                                                                       | Median 3.13 (excess boy) vs 3.23 (sufficient boy); 3.85 (excess girl) vs 2.92 (sufficient girl) |
| Sang, 2013, China, 7-13y [44]              | 1030 µg/L (n = 371 high iodine area HI);123 µg/L (n = 150 adequate iodine area AI)                      | • Sensitive TSH<br>• Higher in HI Median 4.01 vs 3.42 p = 0.001          | Mean 16.4 (HI) vs 16.3 (AI)                    | Mean 6.28 (HI) vs 6.31 (AI)             |                                                                                       | Higher body surface area-adjusted Tvol in higher UIC beta = 0.22; P = 0.002                     |
| Zimmermann, 2013, 12 countries, 6-12y [63] | All: 151 µg/L (n = 2512 12 countries) 100–199.9 µg/l n = 609, 200–299.9 µg/l n = 468, >300 µg/l n = 477 | Higher in more than adequate or excess; Mean 0.84 vs 0.87 vs 0.91 p<0.05 |                                                |                                         | Highest in excess: Mean 9.4 vs 11.8 vs 17.4 p<0.05                                    |                                                                                                 |
| Medani, 2012, Sudan, 6-12y [50]            | 452.9 µg/L (n = 31 high iodine city), 51 µg/L (n = 329 other cities)                                    | Higher in excess: Mean 3.71 vs 2.11 p = 0.008                            |                                                |                                         | Mean 46.0 ng/ml vs 37.2 ng/ml P = 0.052                                               |                                                                                                 |
| Zimmermann, 2005, 5 countries, 6-12y [64]  | All 218 µg/L (n = 3319 7 areas) 728 µg/L (n = 280 highest iodine area)                                  |                                                                          |                                                |                                         |                                                                                       | All 2.54; 4.91 (highest area) age and body surface area adjusted; began to rise at UIC>500 µg/L |
| Gao, 2004, China, 6-11y [45]               | Mean 631 µg/L (n = 112) vs 338 µg/L (n = 110) vs 99 µg/L (n = 116)                                      | 3.4 vs 3.3 vs 2.3 p = 0.02                                               |                                                |                                         | 13.7 vs 7.7 vs 3.2 p = 0.001                                                          |                                                                                                 |
| Boyages, 1989, China 7-15y [59]            | 1236.5 µg/g cre (n = 29 excess area); 428.4 µg/g cre (n = 26 sufficient area)                           | Mean 5.2 (excess) vs 3.9 (sufficient) NS                                 | Mean 19.1 (excess) vs 16.2 (sufficient) p<0.05 |                                         |                                                                                       |                                                                                                 |

Abbreviations: MUIC, median or mean urinary iodine concentration; TSH, thyroid-stimulating hormone; FT4, free thyroxine; FT3, free triiodothyronine NS, not significant

doi:10.1371/journal.pone.0173722.t006

were 2.78 (CI:1.47 to 5.27) and 2.03 (CI:1.58 to 2.62), respectively and when the study in the elderly was excluded, odds ratios were 2.44 (CI:1.21 to 4.91) and 1.95 (CI:1.47 to 2.58).

In the child studies, the sex ratio of participants (boy:girl) was 1.2–1.5:1. The Forest plot for SCH in children is shown in Fig 2C, but heterogeneity was high. Heterogeneity was also high in pregnant women (Fig 2D). A bubble and spaghetti plot between urinary iodine concentration and the percentage of SCH in all age groups is shown in Fig 3. Papers which described UIC in categories and did not show the median or mean was excluded from this figure, because median or mean UIC could not be plotted [43, 66, 67]. Apart from one study from Japan [38], these studies show an increase in the percentage of SCH along with an increase in median UIC. Funnel plots of cross-sectional studies were not asymmetrical, albeit that the number of papers was limited (plots not shown).

### Hyperthyroidism in cross-sectional studies in adults, children and pregnant women

Hyperthyroidism was described in five studies in adults (Table 4) [35–39], three studies in children (Table 5) [43–45] and one study in pregnant women (Table 7) [68]. Iodine-induced hyperthyroidism is of concern where iodine supplementation has recently been introduced,

Table 7. Cross-sectional studies including excess median urinary iodine in pregnant women.

| Author, Year, Country      | Number of subjects, gestation | MUIC                                                                                                      | Overt hypothyroidism                                                                                         | Subclinical hypothyroidism                                                                                                                                      | Isolated hypothyroxinemia                                                                                | Hyperthyroidism (overt and subclinical)     | TSH mIU/L                                                                                               | FT4                                                                                                               | FT3                                                   | Tg                                                                                                                |
|----------------------------|-------------------------------|-----------------------------------------------------------------------------------------------------------|--------------------------------------------------------------------------------------------------------------|-----------------------------------------------------------------------------------------------------------------------------------------------------------------|----------------------------------------------------------------------------------------------------------|---------------------------------------------|---------------------------------------------------------------------------------------------------------|-------------------------------------------------------------------------------------------------------------------|-------------------------------------------------------|-------------------------------------------------------------------------------------------------------------------|
| Cho, 2015, Korea [66]      | 344, first-third trimester    | Total: 427.3 µg/L<br>150–249 µg/L n = 47 (14%),<br>250–499 µg/L n = 74 (21%),<br>≥ 500 µg/L n = 150 (44%) | No statistically significant differences were noted 0.7% (150–249 µg/L) 1.2% (250–499 µg/L) 0.9% (>500 µg/L) | Higher in excess: Adjusted OR 1 (150–249 µg/L ref), 1.72 (1.13–2.61) (250–499 µg/L), 2.17 (1.13–4.19) (≥500 µg/L) P<0.05; 2.4% (150–249 µg/L); 5.7% (≥500 µg/L) | Higher in excess: OR 1 (150–249 µg/L ref), 1.05 (0.59–1.87) (250–499 µg/L), 2.85 (1.40–5.81) (≥500 µg/L) |                                             | Median 1.44 (150–249 µg/L), 1.48 (250–499 µg/L), 1.56 (≥500 µg/L) NS                                    | Lower in excess: median 16.12 pmol/L (150–249 µg/L ref), 15.95 (250–499 µg/L) p = 0.06, 15.27 (≥500 µg/L) p<0.001 |                                                       | Higher in excess: median 10.18 µg/L (150–249 µg/L ref), 10.97 (250–499 µg/L) p = 0.001, 13.58 (≥500 µg/L) p<0.001 |
| Shi, 2015, China [66]      | 7190, 4–8w                    | Total: 152.6 µg/L; 150–249 µg/L n = 2459 (34.2%), 250–499 µg/L n = 1040 (14.5%), ≥500 µg/L n = 229 (3.2%) | 17% (150–249 µg/L) vs 1.4% (≥250 µg/L) P<0.01                                                                | 9% (150–249 µg/L) vs 7% (≥250 µg/L)                                                                                                                             | Not statistically different                                                                              |                                             | • 2.00 mIU/L (150–249 µg/L) vs 1.42 (250 µg/L) • High TSH Adjusted OR 0.44 (250 µg/L, ref 150–249 µg/L) | Median 0.79 ng/dl (150–249 µg/L) vs 0.85 (250 µg/L)                                                               | Median 1.30 ng/ml (150–249 µg/L) vs 12.3 (250 µg/L)   |                                                                                                                   |
| Habimana, 2014, Congo [67] | 225, first-third trimester    | Total: 138 µg/L; 150–249 µg/L n = 35<br>≥250 µg/L n = 70                                                  | 0.5% vs 0%                                                                                                   | 20% vs 2.3% p<0.001 OR 6.2 (p = 0.04 UIC>250 ref UIC<250)                                                                                                       |                                                                                                          | 0.5% vs 0% (overt) 1.9% vs 0% (subclinical) | • Sensitive TSH 2.89 vs 2.19 p = 0.001                                                                  | Lower in excess: mean 13.35 vs 13.77 p = 0.04                                                                     | Higher in excess: mean 4.03 vs 3.78 p<0.001           |                                                                                                                   |
| Sang, 2012, China [68]     | 384, third trimester          | 1240.7 µg/L (n = 210, excess area), 217.06 (n = 174, adequate area)                                       | 0.5% vs 0%                                                                                                   |                                                                                                                                                                 |                                                                                                          |                                             |                                                                                                         |                                                                                                                   |                                                       |                                                                                                                   |
| Orito, 2009, Japan [69]    | 514, 7–15w                    | 328 µg/L                                                                                                  |                                                                                                              |                                                                                                                                                                 |                                                                                                          |                                             | Higher in high urinary iodine r = 0.1326; p = 0.003                                                     | Lower in high urinary iodine r = -0.1801; p = 0.00004                                                             | Lower in high urinary iodine r = -0.1701; p = 0.00011 |                                                                                                                   |

Abbreviations: MUIC, median or mean urinary iodine concentration; TSH, thyroid-stimulating hormone; FT3, free triiodothyronine; NS, not significant; r, correlation coefficient

doi:10.1371/journal.pone.0173722.t007

(A) Subclinical hypothyroidism in observational studies in adults

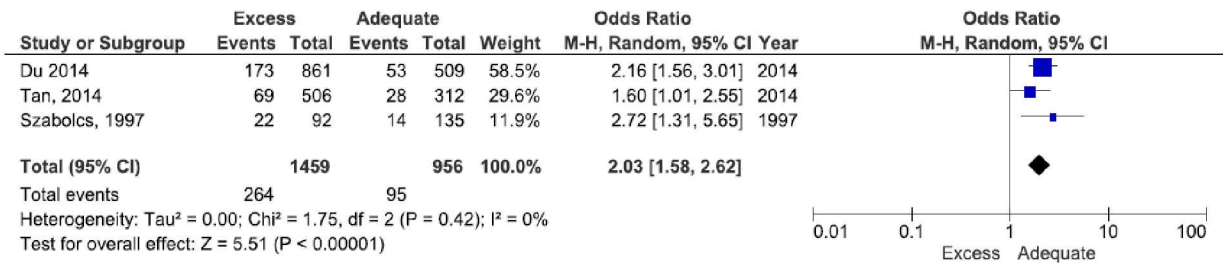

(B) Overt hypothyroidism in observational studies in adults

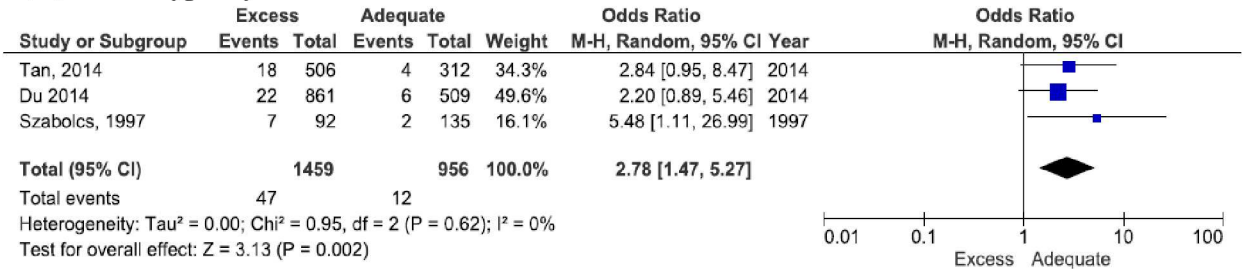

(C) Subclinical hypothyroidism in observational studies in children

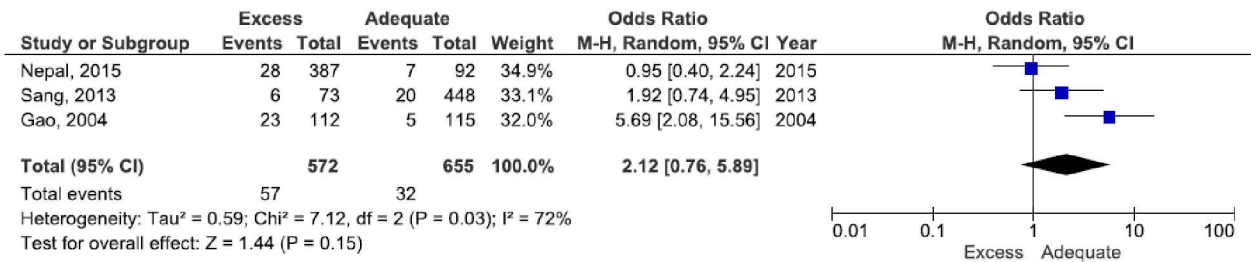

(D) Subclinical hypothyroidism in observational studies in pregnant women

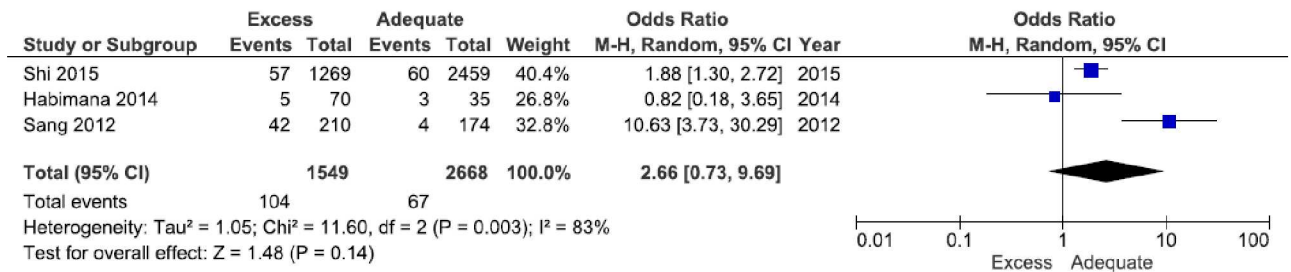

**Fig 2. Forest plots of hypothyroidism in excess iodine status in observational studies.** Crude number of cases and total was used to calculate odds ratio in each study. Adults [35–37], children [43–45], and pregnant women [66–68] were included in this analyses.

doi:10.1371/journal.pone.0173722.g002

but only one adult study, from Zimbabwe, met our inclusion criteria. The percentage of subjects with biochemical hyperthyroidism was 3% in this population [39]. Other studies compared more than two areas, one of which was an excess iodine area, but none of these studies showed a significant difference in adults, children and pregnant women studies.



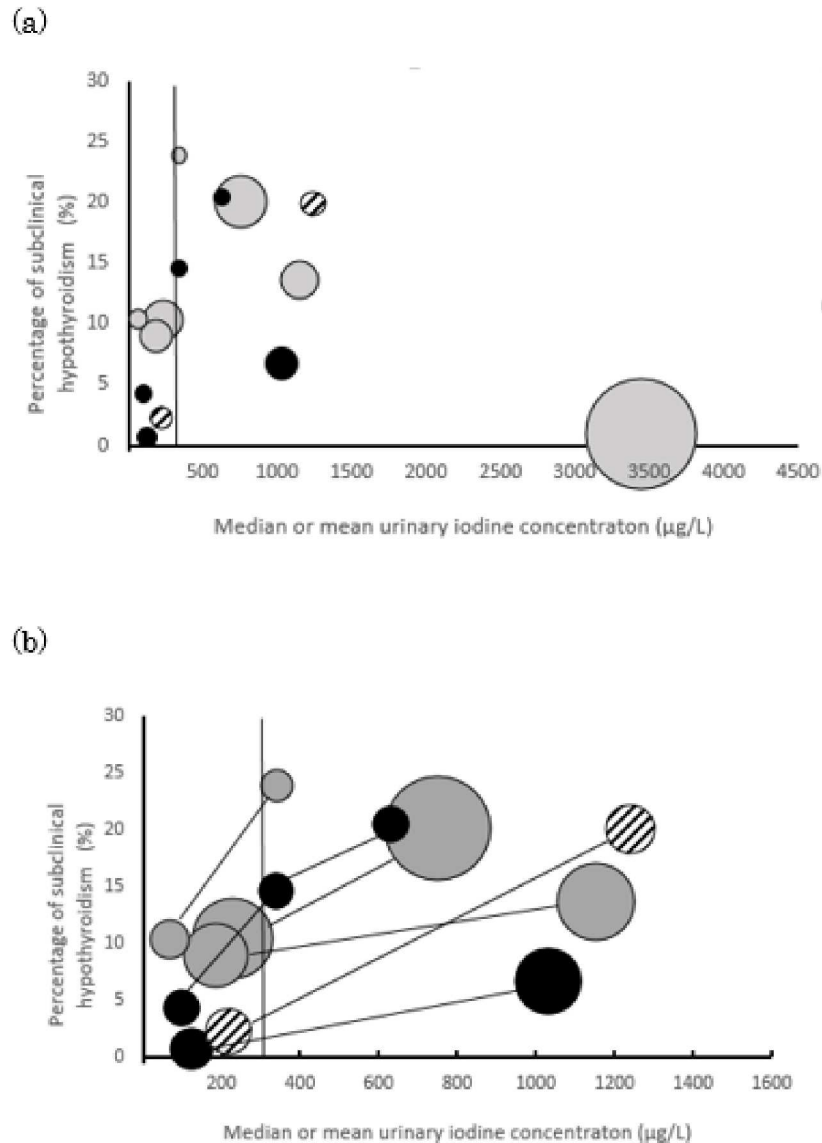

**Fig 3. Plots regarding the prevalence of subclinical hypothyroidism and urinary iodine concentration.** (a) Size of a bubble shows the sample size of the study population. Gray bubbles are from studies in adults [35–38], black bubbles are for children [44, 45] and white with black line is for pregnant woman [68]. Papers which showed both the percentage of subclinical hypothyroidism and median or mean urinary iodine concentration were included. Papers which described UIC in categories and did not show the median or mean was excluded from this figure [43, 66, 67]. Vertical line of 300 µg/L is shown. (b) papers included in plot (a) and those compared in more than two areas in the study were plotted. Bubbles from the same paper were connected with lines. Colors of bubbles mean the same as (a).

doi:10.1371/journal.pone.0173722.g003

### Goiter in cross-sectional studies in adults, children and pregnant women

The percentage of goiter was assessed in four adult studies (Table 4) [35, 37, 41, 42] and 16 studies in children (Table 5) [41, 46, 47–55, 56–60]. No reports were found in pregnant women.

In adults, the difference in the percentage of goiter among three iodine status areas was significant in one study [37] but not significant in the other study. In the child studies (Table 5), goiter was examined by palpation in seven studies [49–51, 56, 58, 59, 60], rate of visible goiter

was described in two studies [41, 55] and ultrasound was used in seven studies [46–48, 52–54, 57]. One study in Chinese children using ultrasound found that goiter rate was significantly higher in the high iodine area than in the control town [46]. In contrast, the other studies did not statistically compare goiter rate. From six studies in Africa [41, 50, 51, 53, 55, 56], goiter rate was distributed widely, from 0% for visible goiters to 86% of goiters diagnosed from thyroid volume to body surface area in ultrasonography. Bimenya *et al.* showed a reduction in goiter rate after the implementation of USI [56], while Seal *et al.* and Henjum *et al.* reported an excess iodine status in refugee camps and a high goiter rate in a high urinary iodine concentration area, respectively [53, 55].

**Nodules in cross-sectional studies in adults, children and pregnant women.** Four cross-sectional studies in adults (Table 4) [35, 37, 40, 42] and two in children (Table 5) [54, 57] evaluated nodules in adults, children and pregnant women. However, results were not consistent: in adults, Du *et al.* showed a significantly high odds ratio in the excess group [35] and Chen *et al.* [40] found no significant difference in adjusted odds ratio, whereas Szabolcs *et al.* reported a significantly low rate in an excess area in elderly people [37]. The two studies in children both described a low rate. [54, 57].

### Biomarkers in cross-sectional studies in adults, children and pregnant women

Among papers in adults, only one showed results for biomarkers of thyroid hormones (footnote of Table 4), namely a significant elevation in TSH in the excess group [36]. In children, nine papers [43–45, 50, 59, 61–64] evaluated biomarkers, of which five also assessed thyroid diseases (Table 6). TSH was significantly elevated in the excess group in half of these studies [44, 45, 50, 63]. Tg is known as a potential biomarker of iodine status [70]. Three studies in children reported significantly higher levels in the excess group than in the adequate group [44, 61, 63]. Zimmermann *et al.* [63] and Shakya *et al.* [61] reported a U-shape curve of Tg from severe deficiency to excess. In pregnant women, five papers described biomarkers [65–69], including three which described biomarkers for both thyroid diseases and thyroid hormones (Table 7). Three studies in pregnant women showed that a higher UIC was associated with a higher TSH [66, 68, 69], while one study in women in all trimesters from the Congo showed that lower UIC (deficient or adequate) was associated with higher TSH [67]. Another of these studies in pregnant women showed significantly higher values in the excess group than in the adequate group [66]. Results for Free T3 (FT3) and Free T4 (FT4) were not consistent among studies, or not significantly different among UIC categories.

From these results, although meta-analysis could not be conducted in some diseases because included studies were few, hyper- and hypothyroidism, goiter and nodule were reported as thyroid diseases under excess iodine status. Especially, SCH was significantly associated with excess iodine intake. Goiter was mainly reported in studies in children. Biomarkers such as TSH and Tg were also mainly reported in children. TSH in the excess group was elevated in half of included studies and a U-shape curve of Tg from severe deficiency to excess was reported in some studies.

### Discussion

This is the first systematic review to evaluate papers which reported excess iodine status. Hyper- and hypothyroidism, goiter and nodule were reported in studies which included excess iodine intake populations. Although diagnostic criteria, degree of excess and source of iodine excess differed among studies of hypothyroidism, SCH in particular was reported to be significantly associated with excess intake as assessed with UIC in several types of studies, including

intervention, case-control, follow-up and cross-sectional studies. Allowing that the quality of some of the included papers was low because of the observational design and lack of adjustment analyses, meta-analysis of OH and SCH in adult studies showed a significant increase in excess areas (OR:2.78 and 2.03, respectively).

Generally, although not all patients with SCH progress to OH, some patients with SCH are treated medically [71]. Therefore, reporting the effect of excess iodine intake on SCH is essential, because at least some of the iodine excess intake might be preventable. The mechanism by which an iodine excess induces thyroid diseases is not completely obvious. In most individuals, escape from the Wolff-Chaikoff effect caused by an acute excess occurs due to a decrease in sodium-iodide symporter (NIS) activity [14]. In some individuals in whom high residual NIS activity prevents adaptation to the Wolff-Chaikoff effect, iodine excess induces hypothyroidism [6]. The randomized controlled trial of Sang *et al.* proposed that a total intake of 800 µg/day confers a risk of SCH (supplementation 400 µg, median UIC 672 µg) [20]. Baseline iodine intake was excess in this trial. In the US, UL is 1,100 µg/day, based on the results of an intravenously supplemented trial of iodine which evaluated TSH concentration [4, 72]. Among the case-control studies in this systematic review, UIC in the hypothyroidism case groups was significantly higher than in the control group in some studies but still less than the UL level, at between 179 to 327 µg/L (Table 2, converted from an intake to excretion ratio of 90% [3]). The exception is a study in Korea, in which UIC was extremely high in both the case and control groups [27]. In cross-sectional studies, UIC in the high iodine areas ranged from 338 to 1241 µg/L (Table 4). Since the high iodine areas in many studies showed a UIC which was much higher than the cut-off value of iodine excess, we were unable to clarify the situation in borderline excess areas. In some studies which compared diseases among UIC categories, differences in the prevalence of SCH in categories over 300 µg/L (or 250 µg/L in pregnant women) did not reach statistical significance [43, 67]. Nevertheless, further research is required to make conclusions about marginally excess areas.

Some studies were from countries in which the main source of iodine is considered to be food, namely the USA [60], Japan [38, 57, 69] and Korea [27, 65], while others were from countries where the main sources of persistent excess iodine are water and salt. Therefore, allowing that the studies differed in the inclusion criteria of participants, the low rate (1%) of SCH in Konno *et al.* [38] from Japan might be influenced by the intermittent consumption of excess iodine, notwithstanding the extremely high mean UIC. In addition to the intermittent intake of high iodine-containing foods, two studies which showed an extremely high UIC used mean instead of median values [27, 42]. Apart from these, Fig 3 shows that many studies in adults, children and pregnant women showed similar results for SCH in our review. Future studies should review the characteristics of vulnerable populations in each group, such as individuals with thyroid antibody. Moreover, they should also study the dose-response relationship, including borderline excess intake, precise mechanisms and susceptibility or preventive factors for SCH.

IIH has been reported in countries in which USI was recently introduced into previously severe iodine-deficiency areas [7, 8]. In our review, only one paper from Zimbabwe reported IIH [39], and this review showed a non-significant increase in hyperthyroidism in areas with a chronic iodine excess. Given that the number of papers about IIH was low, unreported cases should be considered.

Some papers have reported that excess iodine status is due to USI, while other papers showed that an excess iodine status occurred in populations despite low utilization of iodized salt, and main source was determined to be water containing iodine. Goiter is one of the main characteristics of iodine deficiency disorders [4]. Although the effect of excess iodine on goiter in the papers included in this review was controversial, monitoring and maintaining an

adequate iodine concentration in salt is essential, given that the goiter rate has decreased in China [24] and Uganda [56] after an increase in UIC following USI implementation. More papers should compare goiter rates between excess and sufficient areas or those before and after USI in one area. The results at this stage are unable to integrate because the assessment of goiter (visible, palpation or ultrasound) and background iodine status differed among studies.

For ethical reasons, a randomized controlled trial to evaluate the threshold for causing thyroid diseases is considered to be difficult. The effect of iodine excess might be better understood by assessing previous papers which examined the safety of the upper limits of iodine, and observational studies in which a population is exposed to chronic excess iodine. However, several limitations of this review warrant mention. First, we only included apparently healthy free-living populations and excluded studies for newborns, assessment of thyroid antibody and the effect of acute excess intake. Individuals with autoimmune thyroiditis seems to be susceptible to high iodine intake [73, 74] and vulnerable sub-populations should be examined in a future review. Regarding confounding factors between excess iodine intake and thyroid diseases, age, sex and positive thyroid antibodies were shown to be associated with thyroid diseases other than iodine intake in the included studies. Even adjusted for age and sex, excess iodine intake and positive TPO antibody were risk factors for SCH independently in Chinese study [31] and interaction effects on the incidence of SCH between high UIC and positive antibody were found in children [44]. However, many studies only identified the crude percentages of the diseases and did not adjust these variables. Therefore, another systematic review for the effect of antibody on thyroid under the iodine excess status should be performed and each study should include multivariate analysis to adjust these variables for establishing the effect of excess iodine intake strictly. Second, our review originally had a problem in reliance because most papers were non-randomized trials and included a high risk of bias, particularly with regard to the adjustment of outcome. Most included papers only described crude percentages. Finally, although funnel plots of cross-sectional studies were not asymmetrical, the number of included studies in each plot was limited, and a risk of publication bias remains. However, considering the difficulty of conducting randomized trials and the lack of any previous systematic review for excess iodine to date, this review has a number of implications for public health administrators. One important message here is the need for monitoring the iodine concentration in local drinking water, and not only the concentration in salt. For researchers, the goiter rate has been mainly assessed in school-age children to date; nevertheless, hypothyroidism should be also carefully monitored in excess iodine areas.

## Conclusion

In conclusion, hyper- and hypothyroidism, goiter and nodule were reported in this systematic review which included studies about excess iodine intake. Although USI improves goiter rate, chronic exposure to excess iodine from water or poorly monitored salt is a risk factor for hypothyroidism in free-living populations. Because of the low quality and limited number of included studies, future well-designed observational studies, especially those reporting adjusted results, are required. Sub-group analyses are also required, including thyroid antibodies.

## Supporting information

**S1 Table. Database-specific search words.**  
(DOCX)

**S2 Table. PRISMA 2009 checklist.**  
(DOC)

**S3 Table. Risk of bias assessment tool.**  
(DOCX)**Author Contributions****Conceptualization:** RK.**Formal analysis:** RK.**Investigation:** RK XY.**Methodology:** RK.**Supervision:** SS.**Writing – original draft:** RK.**Writing – review & editing:** SK SS.**References**

1. World Health Organization. Guideline: fortification of food-grade salt with iodine for the prevention and control of iodine deficiency disorders. Geneva: World Health Organization; 2014.
2. Andersson M, Karumbunathan V, Zimmermann MB. Global iodine status in 2011 and trends over the past decade. *J Nutr.* 2012; 142: 744–750. doi: [10.3945/jn.111.149393](https://doi.org/10.3945/jn.111.149393) PMID: [22378324](https://pubmed.ncbi.nlm.nih.gov/22378324/)
3. Food and Nutrition Board, Institute of Medicine. Dietary Reference Intakes for Vitamin A, Vitamin K, Arsenic, Boron, Chromium, Copper, Iodine, Iron, Manganese, Molybdenum, Nickel, Silicon, Vanadium, and Zinc. Washington D.C.: National Academy Press; 2001.
4. World Health Organization. Urinary iodine concentrations for determining iodine status deficiency in populations. Vitamin and Mineral Nutrition Information System. Geneva: World Health Organization; 2013. Available: [http://apps.who.int/iris/bitstream/10665/85972/1/WHO\\_NMH\\_NHD\\_EPG\\_13.1\\_eng.pdf](http://apps.who.int/iris/bitstream/10665/85972/1/WHO_NMH_NHD_EPG_13.1_eng.pdf).
5. Laurberg P, Cerqueira C, Ovesen L, Rasmussen LB, Perrild H, Andersen S, et al. Iodine intake as a determinant of thyroid disorders in populations. *Best Pract Res Clin Endocrinol Metab.* 2010; 24: 13–27. doi: [10.1016/j.beem.2009.08.013](https://doi.org/10.1016/j.beem.2009.08.013) PMID: [20172467](https://pubmed.ncbi.nlm.nih.gov/20172467/)
6. Bürgi H. Iodine excess. *Best Pract Res Clin Endocrinol Metab.* 2010; 24: 107–115. doi: [10.1016/j.beem.2009.08.010](https://doi.org/10.1016/j.beem.2009.08.010) PMID: [20172475](https://pubmed.ncbi.nlm.nih.gov/20172475/)
7. Delange F, de Benoist B, Alnwick D. Risks of iodine-induced hyperthyroidism after correction of iodine deficiency by iodized salt. *Thyroid.* 1999; 9: 545–556. doi: [10.1089/thy.1999.9.545](https://doi.org/10.1089/thy.1999.9.545) PMID: [10411116](https://pubmed.ncbi.nlm.nih.gov/10411116/)
8. Stanbury JB, Ermans AE, Bourdoux P, Todd C, Oken E, Tonglet R, et al. Iodine-induced hyperthyroidism: occurrence and epidemiology. *Thyroid.* 1998; 8: 83–100. doi: [10.1089/thy.1998.8.83](https://doi.org/10.1089/thy.1998.8.83) PMID: [9492158](https://pubmed.ncbi.nlm.nih.gov/9492158/)
9. Todd CH, Allain T, Gomo ZA, Hasler JA, Ndiweni M, Oken E. Increase in thyrotoxicosis associated with iodine supplements in Zimbabwe. *Lancet.* 1995; 346: 1563–1564. PMID: [7491075](https://pubmed.ncbi.nlm.nih.gov/7491075/)
10. Roti E, Uberti ED. Iodine excess and hyperthyroidism. *Thyroid.* 2001; 11: 493–500. doi: [10.1089/105072501300176453](https://doi.org/10.1089/105072501300176453) PMID: [11396708](https://pubmed.ncbi.nlm.nih.gov/11396708/)
11. Vagenakis AG, Wang CA, Burger A, Maloof F, Braverman LE, Ingbar SH. Iodine induced thyrotoxicosis in Boston. *N Engl J Med.* 1972; 287: 523–527. doi: [10.1056/NEJM197209142871101](https://doi.org/10.1056/NEJM197209142871101) PMID: [5050425](https://pubmed.ncbi.nlm.nih.gov/5050425/)
12. Ishizuki Y, Yamauchi K, Miura Y. Transient thyrotoxicosis induced by Japanese kombu. *Nihon Naibunpi Gakkai Zasshi.* 1989; 65: 91–98. (Article in Japanese) PMID: [2744193](https://pubmed.ncbi.nlm.nih.gov/2744193/)
13. Wolff J, Chaikoff IL. Plasma inorganic iodide as a homeostatic regulator of thyroid function. *J Biol Chem.* 1948; 174: 555–564. PMID: [18865621](https://pubmed.ncbi.nlm.nih.gov/18865621/)
14. Eng PH, Cardona GR, Fang SL, Previti M, Alex S, Carrasco N, et al. Escape from the acute Wolff-Chaikoff effect is associated with a decrease in thyroid sodium/iodide symporter messenger ribonucleic acid and protein. *Endocrinology.* 1999; 140: 3404–3410. doi: [10.1210/endo.140.8.6893](https://doi.org/10.1210/endo.140.8.6893) PMID: [10433193](https://pubmed.ncbi.nlm.nih.gov/10433193/)
15. Leung AM, Braverman LE. Consequences of excess iodine. *Nat Rev Endocrinol.* 2014; 10:136–142. doi: [10.1038/nrendo.2013.251](https://doi.org/10.1038/nrendo.2013.251) PMID: [24342882](https://pubmed.ncbi.nlm.nih.gov/24342882/)

16. Montenegro-Bethancourt G, Johner SA, Stehle P, Neubert A, Remer T. Iodine status assessment in children: spot urine iodine concentration reasonably reflects true twenty-four-hour iodine excretion only when scaled to creatinine. *Thyroid*. 2015; 25: 688–697. doi: [10.1089/thy.2015.0006](https://doi.org/10.1089/thy.2015.0006) PMID: [25781006](https://pubmed.ncbi.nlm.nih.gov/25781006/)
17. Higgins JPT, Green S (editors). *Cochrane Handbook for Systematic Reviews of Interventions* Version 5.1.0 [updated March 2011]. The Cochrane Collaboration, 2011. Available: [www.cochrane-handbook.org](http://www.cochrane-handbook.org).
18. Kim SY, Park JE, Lee YJ, Seo HJ, Sheen SS, Hahn S, et al. Testing a tool for assessing the risk of bias for nonrandomized studies showed moderate reliability and promising validity. *J Clin Epidemiol*. 2013; 66: 408–414. doi: [10.1016/j.jclinepi.2012.09.016](https://doi.org/10.1016/j.jclinepi.2012.09.016) PMID: [23337781](https://pubmed.ncbi.nlm.nih.gov/23337781/)
19. Higgins JP, Thompson SG. Quantifying heterogeneity in a meta-analysis. *Stat Med*. 2002; 21: 1539–1558. doi: [10.1002/sim.1186](https://doi.org/10.1002/sim.1186) PMID: [12111919](https://pubmed.ncbi.nlm.nih.gov/12111919/)
20. Sang Z, Wang PP, Yao Z, Shen J, Halfyard B, Tan L, et al. Exploration of the safe upper level of iodine intake in euthyroid Chinese adults: a randomized double-blind trial. *Am J Clin Nutr*. 2012; 95: 367–373. doi: [10.3945/ajcn.111.028001](https://doi.org/10.3945/ajcn.111.028001) PMID: [22205314](https://pubmed.ncbi.nlm.nih.gov/22205314/)
21. Thomson CD, Campbell JM, Miller J, Skeaff SA. Minimal impact of excess iodate intake on thyroid hormones and selenium status in older New Zealanders. *Eur J Endocrinol*. 2011; 165: 745–752. doi: [10.1530/EJE-11-0575](https://doi.org/10.1530/EJE-11-0575) PMID: [21878580](https://pubmed.ncbi.nlm.nih.gov/21878580/)
22. Namba H, Yamashita S, Kimura H, Yokoyama N, Usa T, Otsuru A, et al. Evidence of thyroid volume increase in normal subjects receiving excess iodide. *J Clin Endocrinol Metab*. 1993; 76:605–608. doi: [10.1210/jcem.76.3.8445017](https://doi.org/10.1210/jcem.76.3.8445017) PMID: [8445017](https://pubmed.ncbi.nlm.nih.gov/8445017/)
23. Kotwal A, Kotwal J, Prakash R, Kotwal N. Does iodine excess lead to hypothyroidism? Evidence from a case-control study in India. *Arch Med Res*. 2015; 46: 490–494. doi: [10.1016/j.arcmed.2015.07.005](https://doi.org/10.1016/j.arcmed.2015.07.005) PMID: [26247626](https://pubmed.ncbi.nlm.nih.gov/26247626/)
24. Wang F, Wang Y, Wang L, Wang X, Sun C, Xing M, et al. Strong association of high urinary iodine with thyroid nodule and papillary thyroid cancer. *Tumour Biol*. 2014; 35: 11375–11379. doi: [10.1007/s13277-014-2397-8](https://doi.org/10.1007/s13277-014-2397-8) PMID: [25119588](https://pubmed.ncbi.nlm.nih.gov/25119588/)
25. Du Q, Zhu H, Yao L. Thyroid function: comparison of women in late pregnancy with control women of reproductive age in regions of dietary iodine excess. *Asia Pac J Public Health*. 2013; 25: 36S–42S. doi: [10.1177/1010539513493314](https://doi.org/10.1177/1010539513493314) PMID: [23858522](https://pubmed.ncbi.nlm.nih.gov/23858522/)
26. Alsayed A, Gad AM, Abdel-Baset H, Abdel-Fattah A, Ahmed A, Azab A. Excess urinary iodine is associated with autoimmune subclinical hypothyroidism among Egyptian women. *Endocr J*. 2008; 55: 601–605. PMID: [18480555](https://pubmed.ncbi.nlm.nih.gov/18480555/)
27. Kim JY, Kim KR. Dietary iodine intake and urinary iodine excretion in patients with thyroid diseases. *Yonsei Med J*. 2000; 41: 22–28. doi: [10.3349/ymj.2000.41.1.22](https://doi.org/10.3349/ymj.2000.41.1.22) PMID: [10731915](https://pubmed.ncbi.nlm.nih.gov/10731915/)
28. ISHIZUKI Y, HIROOKA Y, MURATA Y. Urinary Iodide Excretion in Japanese People and Thyroid Dysfunction. *Folia Endocrinologica Japonica*. 1992; 68:550–556. (Article in Japanese) PMID: [1644207](https://pubmed.ncbi.nlm.nih.gov/1644207/)
29. Teng W, Shan Z, Teng X, Guan H, Li Y, Teng D, et al. Effect of iodine intake on thyroid diseases in China. *N Engl J Med*. 2006; 354: 2783–1793. doi: [10.1056/NEJMoa054022](https://doi.org/10.1056/NEJMoa054022) PMID: [16807415](https://pubmed.ncbi.nlm.nih.gov/16807415/)
30. Yu X, Fan C, Shan Z, Teng X, Guan H, Li Y, et al. A five-year follow-up study of goiter and thyroid nodules in three regions with different iodine intakes in China. *J Endocrinol Invest*. 2008; 31: 243–250. doi: [10.1007/BF03345597](https://doi.org/10.1007/BF03345597) PMID: [18401207](https://pubmed.ncbi.nlm.nih.gov/18401207/)
31. Chong W, Shan ZY, Sun W, Teng WP. Multivariate analysis of relationships between iodine biological exposure and subclinical thyroid dysfunctions. *Chin Med Sci J*. 2005; 20: 202–205. PMID: [16261894](https://pubmed.ncbi.nlm.nih.gov/16261894/)
32. Chong W, Shi X, Shan Z, Teng X, Teng D, Guan H, et al. Tg in Adults as a Sensitive Biomarker of Iodine Status: A 5-Year Follow up Population Study in Different Levels of Iodine Intake Regions. *PLoS One*. 2015; 10:e0135553. doi: [10.1371/journal.pone.0135553](https://doi.org/10.1371/journal.pone.0135553) PMID: [26266530](https://pubmed.ncbi.nlm.nih.gov/26266530/)
33. Wang P, Sun H, Shang L, Zhang Q, He Y, Chen Z et al. Low Goiter Rate Associated with Small Average Thyroid Volume in Schoolchildren after the Elimination of Iodine Deficiency Disorders. *PLoS One*. 2015; 10:e0141552. doi: [10.1371/journal.pone.0141552](https://doi.org/10.1371/journal.pone.0141552) PMID: [26513146](https://pubmed.ncbi.nlm.nih.gov/26513146/)
34. Aakre I, Bjørø T, Norheim I, Strand TA, Barikmo I, Henjum S. Development of thyroid dysfunction among women with excessive iodine intake—A 3-year follow-up. *J Trace Elem Med Biol*. 2015; 31: 61–66. doi: [10.1016/j.jtemb.2015.03.004](https://doi.org/10.1016/j.jtemb.2015.03.004) PMID: [26004893](https://pubmed.ncbi.nlm.nih.gov/26004893/)
35. Du Y, Gao Y, Meng F, Liu S, Fan Z, Wu J, Sun D. Iodine deficiency and excess coexist in china and induce thyroid dysfunction and disease: a cross-sectional study. *PLoS One*. 2014; 9:e111937. doi: [10.1371/journal.pone.0111937](https://doi.org/10.1371/journal.pone.0111937) PMID: [25375854](https://pubmed.ncbi.nlm.nih.gov/25375854/)
36. Tan L, Sang Z, Shen J, Liu H, Chen W, Zhao N, et al. Prevalence of thyroid dysfunction with adequate and excessive iodine intake in Hebei Province, People's Republic of China. *Public Health Nutr*. 2015; 18: 1692–1697. doi: [10.1017/S1368980014002237](https://doi.org/10.1017/S1368980014002237) PMID: [25373938](https://pubmed.ncbi.nlm.nih.gov/25373938/)

37. Szabolcs I, Podoba J, Feldkamp J, Dohan O, Farkas I, Sajgó M, et al. Comparative screening for thyroid disorders in old age in areas of iodine deficiency, long-term iodine prophylaxis and abundant iodine intake. *Clin Endocrinol (Oxf)*. 1997; 47: 87–92.
38. Konno N, Yuri K, Taguchi H, Miura K, Taguchi S, Hagiwara K et al. Screening for thyroid diseases in an iodine sufficient area with sensitive thyrotrophin assays, and serum thyroid autoantibody and urinary iodide determinations. *Clin Endocrinol (Oxf)*. 1993; 38: 273–281.
39. Gomo ZA, Allain TJ, Matenga JA, Ndemere B, Wilson A, Urdal P. Urinary iodine concentrations and thyroid function in adult Zimbabweans during a period of transition in iodine status. *Am J Clin Nutr*. 1999; 70: 888–891. PMID: [10539750](#)
40. Chen Z, Xu W, Huang Y, Jin X, Deng J, Zhu S, et al. Associations of noniodized salt and thyroid nodule among the Chinese population: a large cross-sectional study. *Am J Clin Nutr*. 2013; 98: 684–692. doi: [10.3945/ajcn.112.054353](#) PMID: [23842457](#)
41. Kassim IA, Moloney G, Busili A, Nur AY, Paron P, Jooste P, et al. Iodine intake in Somalia is excessive and associated with the source of household drinking water. *J Nutr*. 2014; 144: 375–381. doi: [10.3945/jn.113.176693](#) PMID: [24500936](#)
42. Henjum S, Barikmo I, Strand TA, Oshaug A, Torheim LE. Iodine-induced goitre and high prevalence of anaemia among Saharawi refugee women. *Public Health Nutr*. 2012; 15: 1512–1518. doi: [10.1017/S1368980011002886](#) PMID: [22053869](#)
43. Nepal AK, Suwal R, Gautam S, Shah GS, Baral N, Andersson M, et al. Subclinical Hypothyroidism and Elevated Thyroglobulin in Infants with Chronic Excess Iodine Intake. *Thyroid*. 2015; 25: 851–859. doi: [10.1089/thy.2015.0153](#) PMID: [25950720](#)
44. Sang Z, Chen W, Shen J, Tan L, Zhao N, Liu H et al. Long-term exposure to excessive iodine from water is associated with thyroid dysfunction in children. *J Nutr*. 2013; 143: 2038–2043. doi: [10.3945/jn.113.179135](#) PMID: [24108132](#)
45. Gao TS, Teng WP, Shan ZY, Jin Y, Guan HX, Teng XC et al. Effect of different iodine intake on school-children's thyroid diseases and intelligence in rural areas. *Chin Med J (Engl)*. 2004; 117:1518–1522.
46. Lv S, Xu D, Wang Y, Chong Z, Du Y, Jia L et al. Goitre prevalence and epidemiological features in children living in areas with mildly excessive iodine in drinking-water. *Br J Nutr*. 2014; 111: 86–92. doi: [10.1017/S0007114513001906](#) PMID: [23768508](#)
47. Lv S, Zhao J, Xu D, Chong Z, Jia L, Du Y et al. An epidemiological survey of children's iodine nutrition and goitre status in regions with mildly excessive iodine in drinking water in Hebei Province, China. *Public Health Nutr*. 2012; 15: 1168–1173. doi: [10.1017/S1368980012000146](#) PMID: [22314228](#)
48. Li WH, Dong BS, Li P, Li YF. Benefits and risks from the national strategy for improvement of iodine nutrition: a community-based epidemiologic survey in Chinese schoolchildren. *Nutrition*. 2012; 28: 1142–1145. doi: [10.1016/j.nut.2012.04.014](#) PMID: [22951152](#)
49. Alsanosy RM, Gaffar AM, Khalafalla HE, Mahfouz MS, Zaid AN, Bani IA. Current iodine nutrition status and progress toward elimination of iodine deficiency disorders in Jazan, Saudi Arabia. *BMC Public Health*. 2012; 12:1006. doi: [10.1186/1471-2458-12-1006](#) PMID: [23167286](#)
50. Medani AM, Elnour AA, Saeed AM. Excessive iodine intake, water chemicals and endemic goitre in a Sudanese coastal area. *Public Health Nutr*. 2013; 16: 1586–1592. doi: [10.1017/S1368980012004685](#) PMID: [23206325](#)
51. Hussein IS, Min Y, Ghebremeskel K, Gaffar AM. Iodine status and fish intake of Sudanese schoolchildren living in the Red Sea and White Nile regions. *Public Health Nutr*. 2012; 15: 2265–2271. doi: [10.1017/S1368980012000833](#) PMID: [22475452](#)
52. Shen H, Liu S, Sun D, Zhang S, Su X, Shen Y, et al. Geographical distribution of drinking-water with high iodine level and association between high iodine level in drinking-water and goitre: a Chinese national investigation. *Br J Nutr*. 2011; 106:243–247. doi: [10.1017/S0007114511000055](#) PMID: [21320367](#)
53. Henjum S, Barikmo I, Gjerlaug AK, Mohamed-Lehabib A, Oshaug A, Strand TA, et al. Endemic goitre and excessive iodine in urine and drinking water among Saharawi refugee children. *Public Health Nutr*. 2010; 13:1472–1477. doi: [10.1017/S1368980010000650](#) PMID: [20359380](#)
54. Duarte GC, Tomimori EK, de Camargo RY, Catarino RM, Ferreira JE, Knobel M, et al. Excessive iodine intake and ultrasonographic thyroid abnormalities in schoolchildren. *J Pediatr Endocrinol Metab*. 2009; 22: 327–334. PMID: [19554806](#)
55. Seal AJ, Creeke PI, Gnat D, Abdalla F, Mirghani Z. Excess dietary iodine intake in long-term African refugees. *Public Health Nutr*. 2006; 9:35–39. PMID: [16480531](#)
56. Bimenya GS, Olico-Okui, Kaviri D, Mbona N, Byarugaba W. Monitoring the severity of iodine deficiency disorders in Uganda. *Afr Health Sci*.2002; 2:63–68. PMID: [12789104](#)

57. Ishigaki K, Namba H, Takamura N, Saiwai H, Parshin V, Ohashi T et al. Urinary iodine levels and thyroid diseases in children; comparison between Nagasaki and Chernobyl. *Endocr J*. 2001; 48: 591–595. PMID: [11789565](#)
58. Zhao J, Wang P, Shang L, Sullivan KM, van der Haar F, Maberly G. Endemic goiter associated with high iodine intake. *Am J Public Health*. 2000; 90: 1633–1635. PMID: [11030003](#)
59. Boyages SC, Bloot AM, Maberly GF, Eastman CJ, Li M, Qian QD, et al. Thyroid autoimmunity in endemic goitre caused by excessive iodine intake. *Clin Endocrinol (Oxf)*. 1989; 31: 453–465.
60. Trowbridge FL, Matovinovic J, McLaren GD, Nichaman MZ. Iodine and goiter in children. *Pediatrics*. 1975; 56: 82–90. PMID: [1153253](#)
61. Shakya PR, Gelal B, Lal Das BK, Lamsal M, Pokharel PK, Nepal AK et al. Urinary iodine excretion and thyroid function status in school age children of hilly and plain regions of Eastern Nepal. *BMC Res Notes*. 2015; 8: 374. doi: [10.1186/s13104-015-1359-6](#) PMID: [26306673](#)
62. Zou Y, Lou X, Ding G, Mo Z, Zhu W, Mao G, et al. An assessment of iodine nutritional status and thyroid hormone levels in children aged 8–10 years living in Zhejiang Province, China: a cross-sectional study. *Eur J Pediatr*. 2014; 173: 929–934. doi: [10.1007/s00431-014-2273-y](#) PMID: [24500398](#)
63. Zimmermann MB, Aeberli I, Andersson M, Assey V, Yorg JA, Jooste P, et al. Thyroglobulin is a sensitive measure of both deficient and excess iodine intakes in children and indicates no adverse effects on thyroid function in the UIC range of 100–299 µg/L: a UNICEF/ICCIDD study group report. *J Clin Endocrinol Metab*. 2013; 98: 1271–1280. doi: [10.1210/jc.2012-3952](#) PMID: [23345097](#)
64. Zimmermann MB, Ito Y, Hess SY, Fujieda K, Molinari L. High thyroid volume in children with excess dietary iodine intakes. *Am J Clin Nutr*. 2005; 81: 840–844. PMID: [15817861](#)
65. Cho YY, Kim HJ, Oh SY, Choi SJ, Lee SY, Joung JY, et al. Iodine status in healthy pregnant women in Korea: a first report. *Eur J Nutr*. 2016; 55: 469–475. doi: [10.1007/s00394-015-0864-7](#) PMID: [25750059](#)
66. Shi X, Han C, Li C, Mao J, Wang W, Xie X, et al. Optimal and safe upper limits of iodine intake for early pregnancy in iodine-sufficient regions: a cross-sectional study of 7190 pregnant women in China. *J Clin Endocrinol Metab*. 2015; 100: 1630–1638. doi: [10.1210/jc.2014-3704](#) PMID: [25629356](#)
67. Habimana L, Twite KE, Daumerie C, Wallemacq P, Donnen P, Kalenga MK, et al. High prevalence of thyroid dysfunction among pregnant women in Lubumbashi, Democratic Republic of Congo. *Thyroid*. 2014; 24: 568–575. doi: [10.1089/thy.2013.0261](#) PMID: [23957235](#)
68. Sang Z, Wei W, Zhao N, Zhang G, Chen W, Liu H, et al. Thyroid dysfunction during late gestation is associated with excessive iodine intake in pregnant women. *J Clin Endocrinol Metab*. 2012; 97: E1363–1369. doi: [10.1210/jc.2011-3438](#) PMID: [22669304](#)
69. Orito Y, Oku H, Kubota S, Amino N, Shimogaki K, Hata M, et al. Thyroid function in early pregnancy in Japanese healthy women: relation to urinary iodine excretion, emesis, and fetal and child development. *J Clin Endocrinol Metab*. 2009; 94: 1683–1688. doi: [10.1210/jc.2008-2111](#) PMID: [19258403](#)
70. Ma ZF, Skeaff SA. Thyroglobulin as a biomarker of iodine deficiency: a review. *Thyroid*. 2014; 24: 1195–1209. doi: [10.1089/thy.2014.0052](#) PMID: [24762031](#)
71. Fatourehchi V. Subclinical Hypothyroidism: An Update for Primary Care Physicians. *Mayo Clin Proc*. 2009; 84: 65–71. doi: [10.1016/S0025-6196\(11\)60809-4](#) PMID: [19121255](#)
72. Gardner DF, Centor RM, Utiger RD. Effects of low dose oral iodide supplementation on thyroid function in normal men. *Clin Endocrinol (Oxf)*. 1988; 28: 283–288.
73. Vanderpump MPJ, Tunbridge WMG, French JM, et al. The incidence of thyroid disorders in the community: a twenty-year follow-up of the Wickham Survey. *Clin Endocrinol (Oxf)* 1995; 43:55–68
74. Dayan CM, Daniels GH. Chronic Autoimmune Thyroiditis. *N Engl J Med* 1996; 335: 99–107. doi: [10.1056/NEJM199607113350206](#) PMID: [8649497](#)
